# Supplementary material for: Synthesis and Characterization of New Dihydronaphthalene Candidates as Potent Cytotoxic Agents against MCF‐7 Human Cancer Cells
Source: Hindawi journal article supplement (doi:10.1155/2020/8649745), 2020-01-01

Current Data Parameters  
 NAME Nesreen Saied\_H\_2  
 EXPNO 10  
 PROCNO 1

F2 - Acquisition Parameters  
 Date\_ 20191002  
 Time 14.54  
 INSTRUM spect  
 PROBHD 5 mm PABBO BB/  
 PULPROG zg30  
 TD 65536  
 SOLVENT DMSO  
 NS 32  
 DS 2  
 SWH 8012.820 Hz  
 FIDRES 0.122266 Hz  
 AQ 4.0894465 sec  
 RG 180.8  
 DW 62.400 usec  
 DE 6.50 usec  
 TE 298.0 K  
 D1 1.00000000 sec  
 TDO 1

==== CHANNEL f1 =====  
 SFO1 400.1924713 MHz  
 NUC1 1H  
 P1 15.00 usec  
 PLW1 10.39999962 W

F2 - Processing parameters  
 SI 65536  
 SF 400.1900000 MHz  
 WDW EM  
 SSB 0  
 LB 0.30 Hz  
 GB 0  
 PC 1.00

10.5205  
 10.0415  
 8.3639  
 8.3423  
 7.6027  
 7.5971  
 7.5803  
 7.5618  
 7.5450  
 7.5395  
 7.5265  
 6.8140  
 6.8075  
 6.7922  
 6.7857  
 6.7788  
 3.7906  
 3.3344  
 2.7674  
 2.7518  
 2.7362  
 2.5155  
 2.5112  
 2.5069

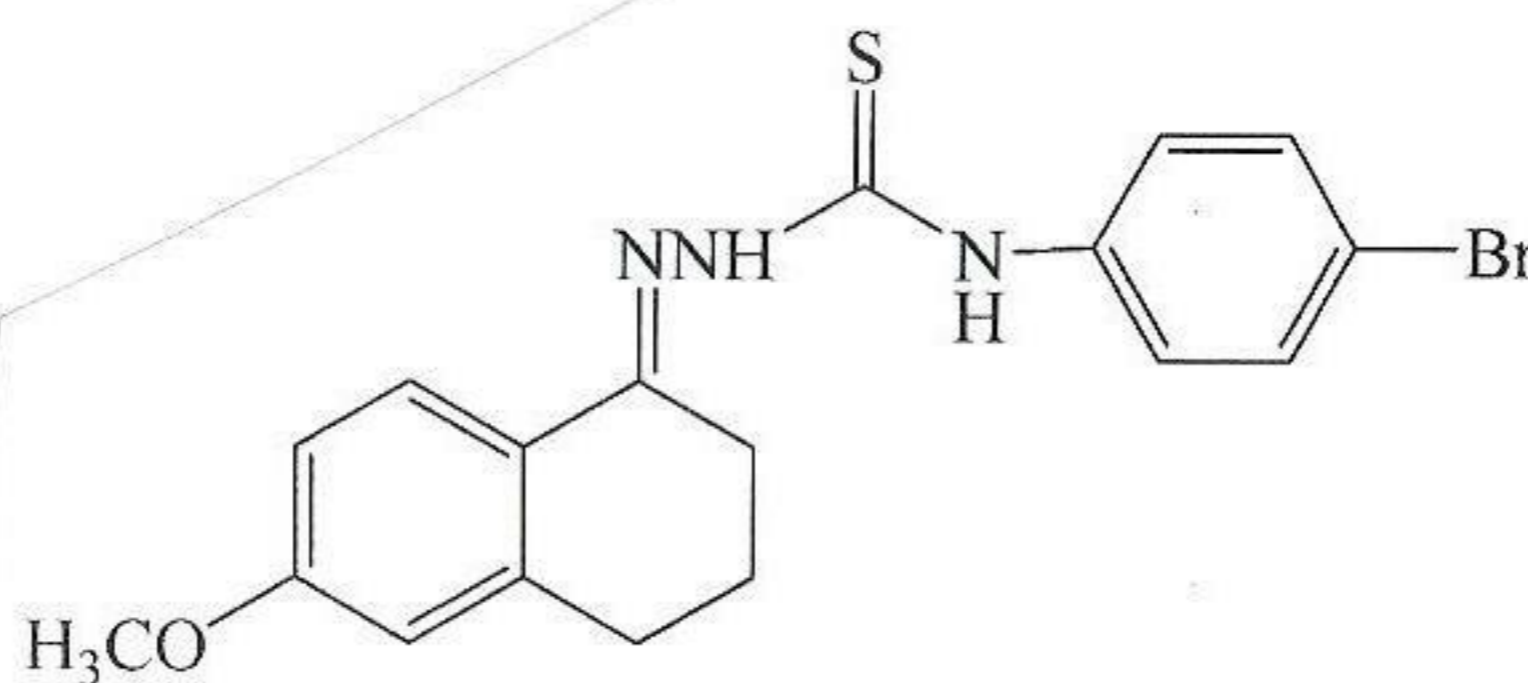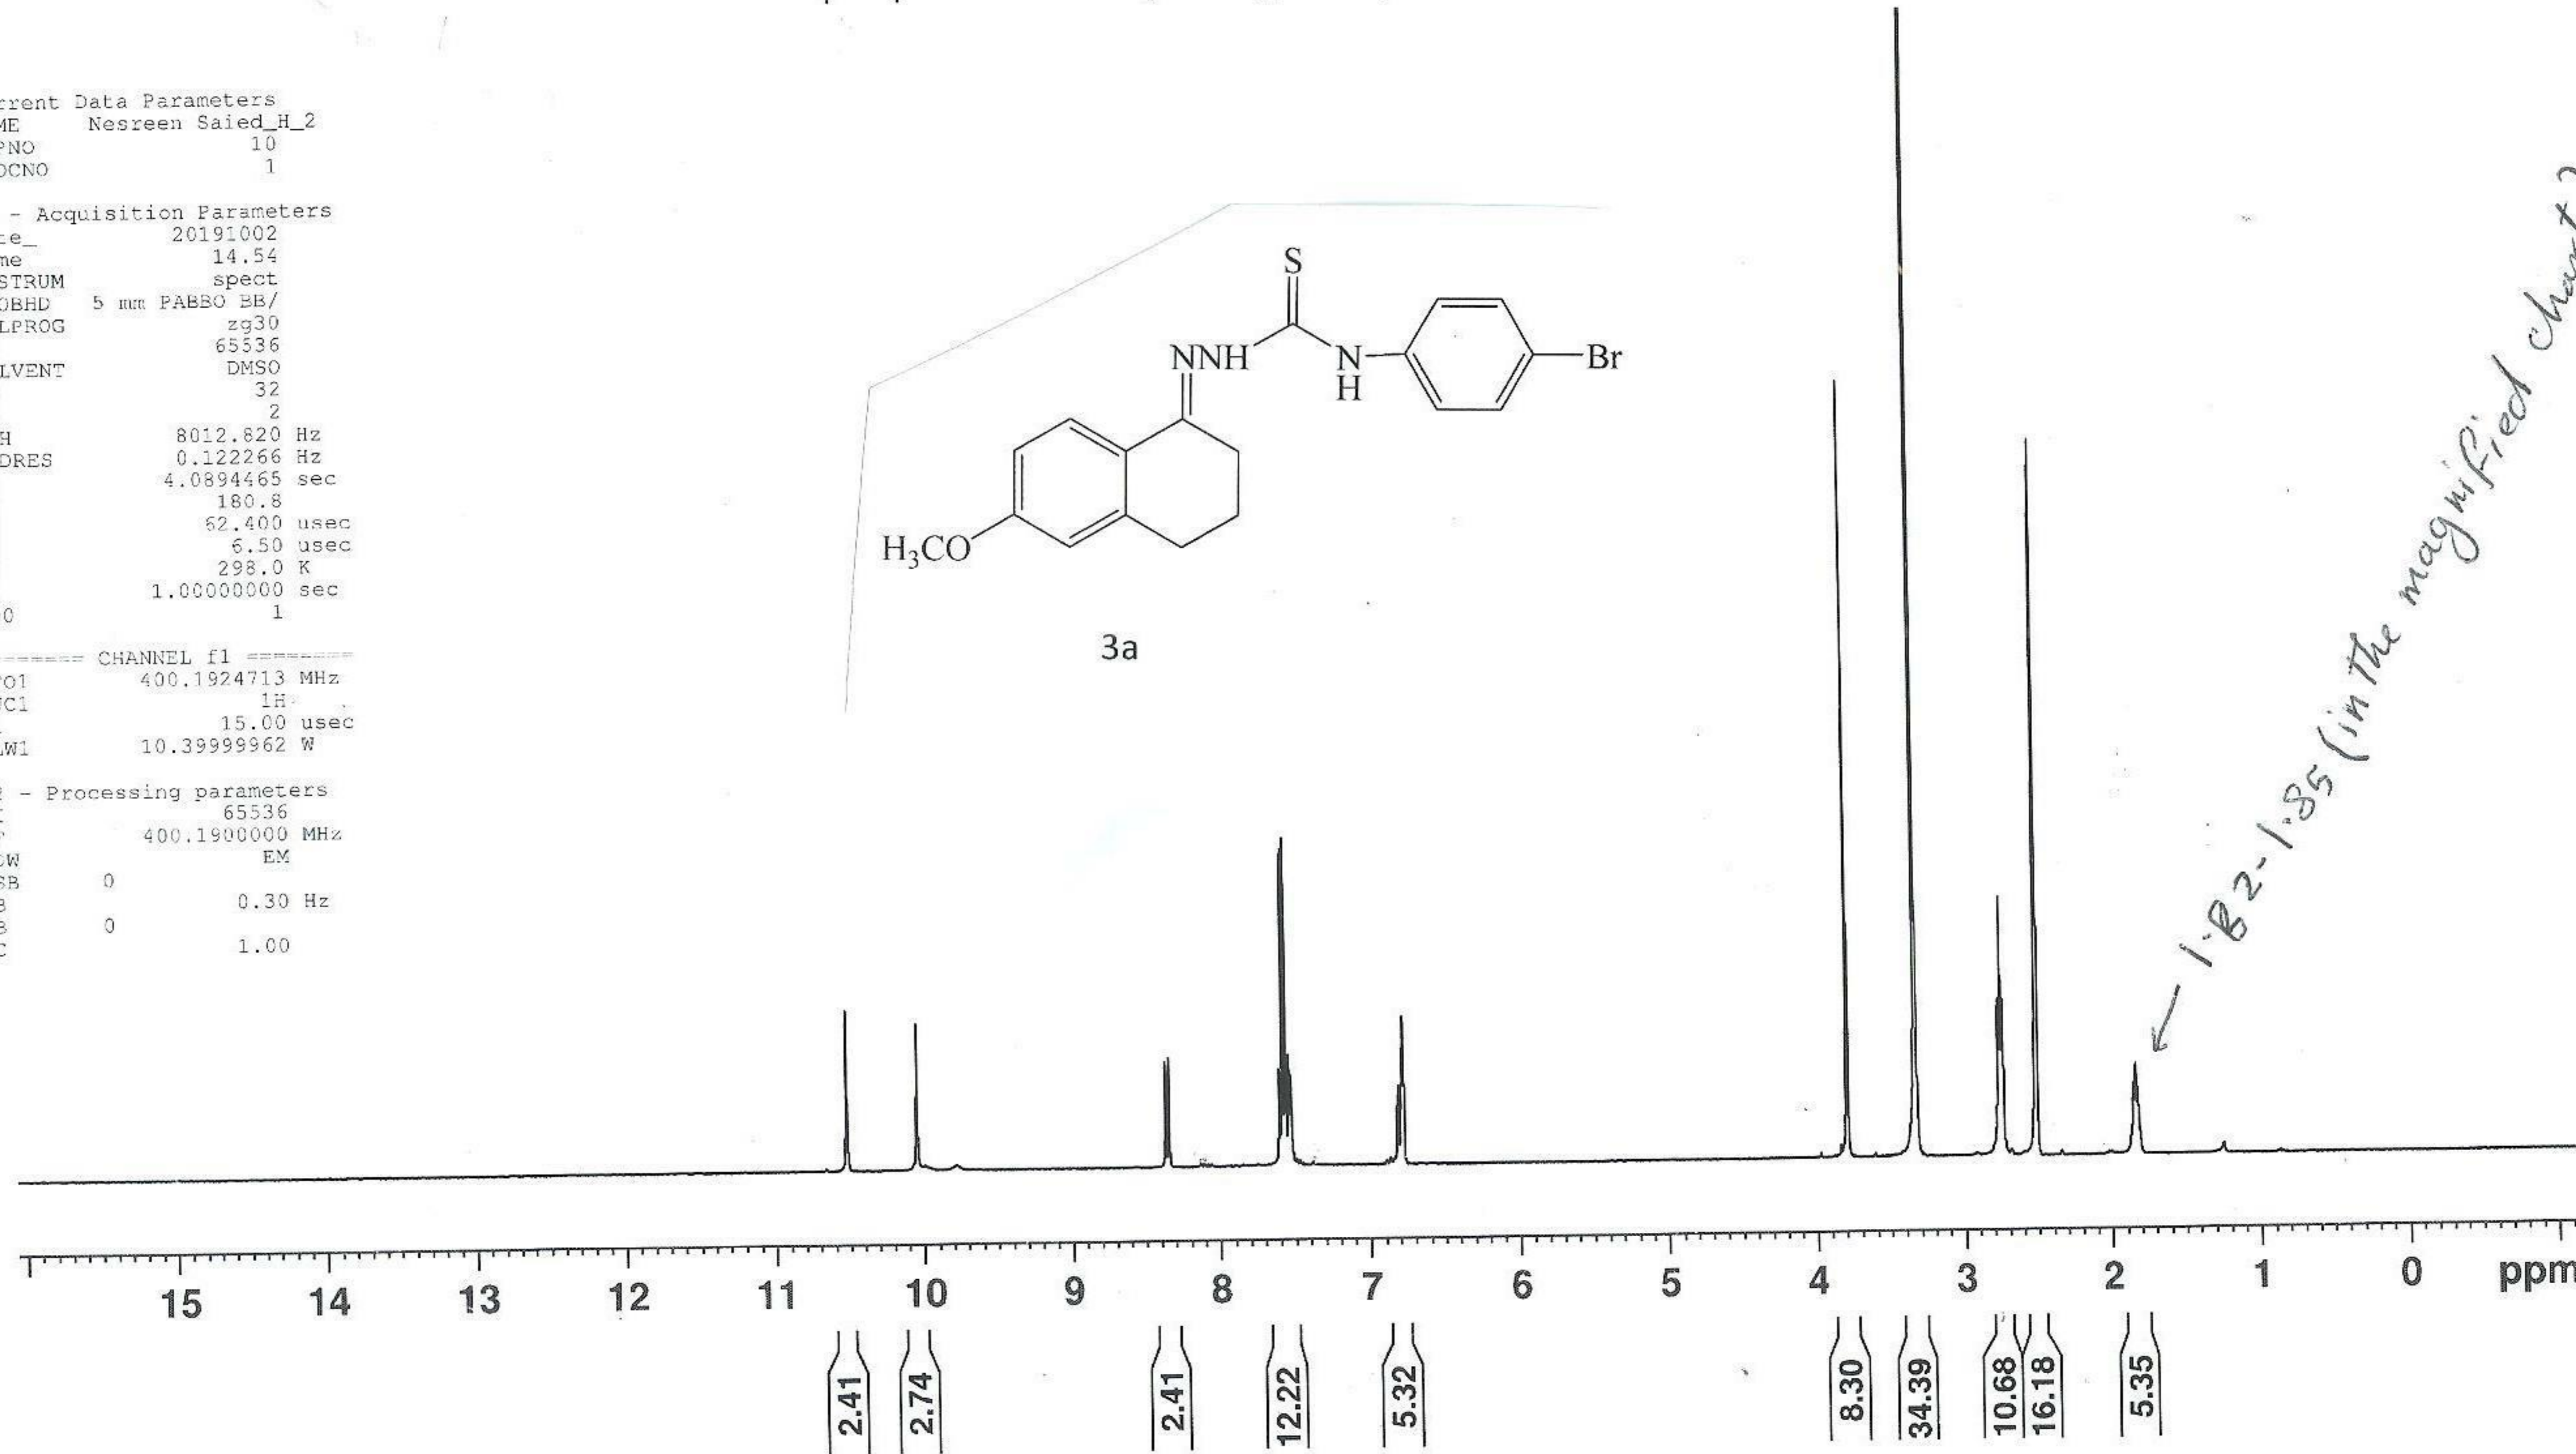

— 176.88 — 160.76 — 150.24 — 142.85 — 139.15 — 131.29 — 128.17 — 128.03 — 124.82 — 117.86 — 113.61 — 112.78 — 55.64 — 40.59 — 40.38 — 40.17 — 39.96 — 39.76 — 39.55 — 39.34 — 29.68 — 26.58 — 21.93

Current Data Parameters  
NAME Nesreen Saeed\_C\_2  
EXPNO 10  
PROCNO 1

F2 - Acquisition Parameters  
Date\_ 20191030  
Time 6.17  
INSTRUM spect  
PROBHD 5 mm PABBO BB/  
PULPROG zgpg30  
TD 65536  
SOLVENT DMSO  
NS 1200  
DS 4  
SWH 24038.461 Hz  
FIDRES 0.366798 Hz  
AQ 1.3631488 sec  
RG 202.37  
DW 20.800 usec  
DE 6.50 usec  
TE 298.0 K  
D1 2.00000000 sec  
D11 0.03000000 sec  
TD0 1

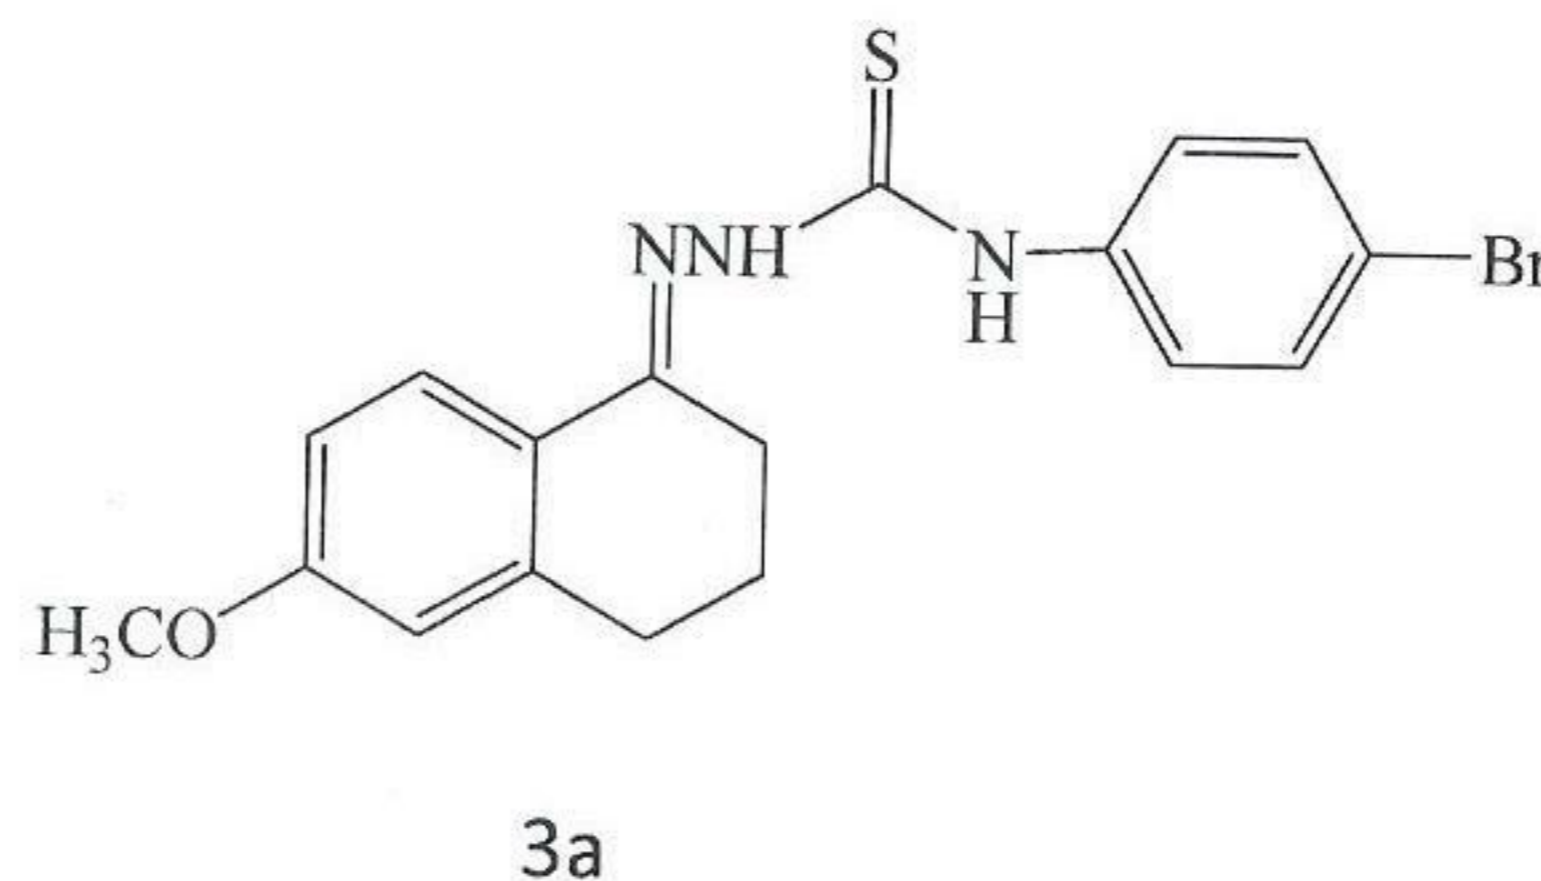

==== CHANNEL f1 =====  
SFO1 100.6379178 MHz  
NUC1 13C  
P1 10.00 usec  
PLW1 45.00000000 W

==== CHANNEL f2 =====  
SFO2 400.1916008 MHz  
NUC2 1H  
CPDPRG[2] waltz16

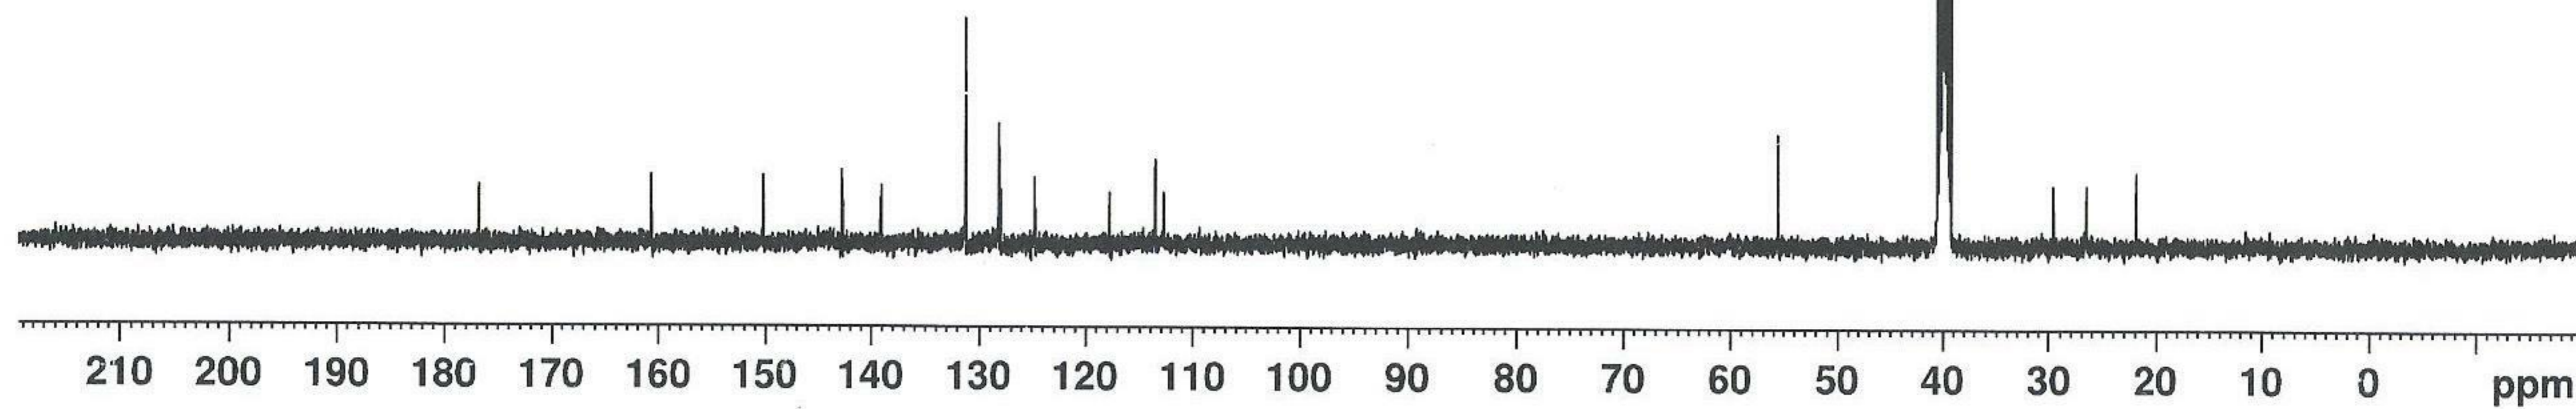

Alaa-2 #33 RT: 0.14 AV: 1 NL: 2.36E4  
T: {0,0} + c EI Full ms [50.00-500.00]

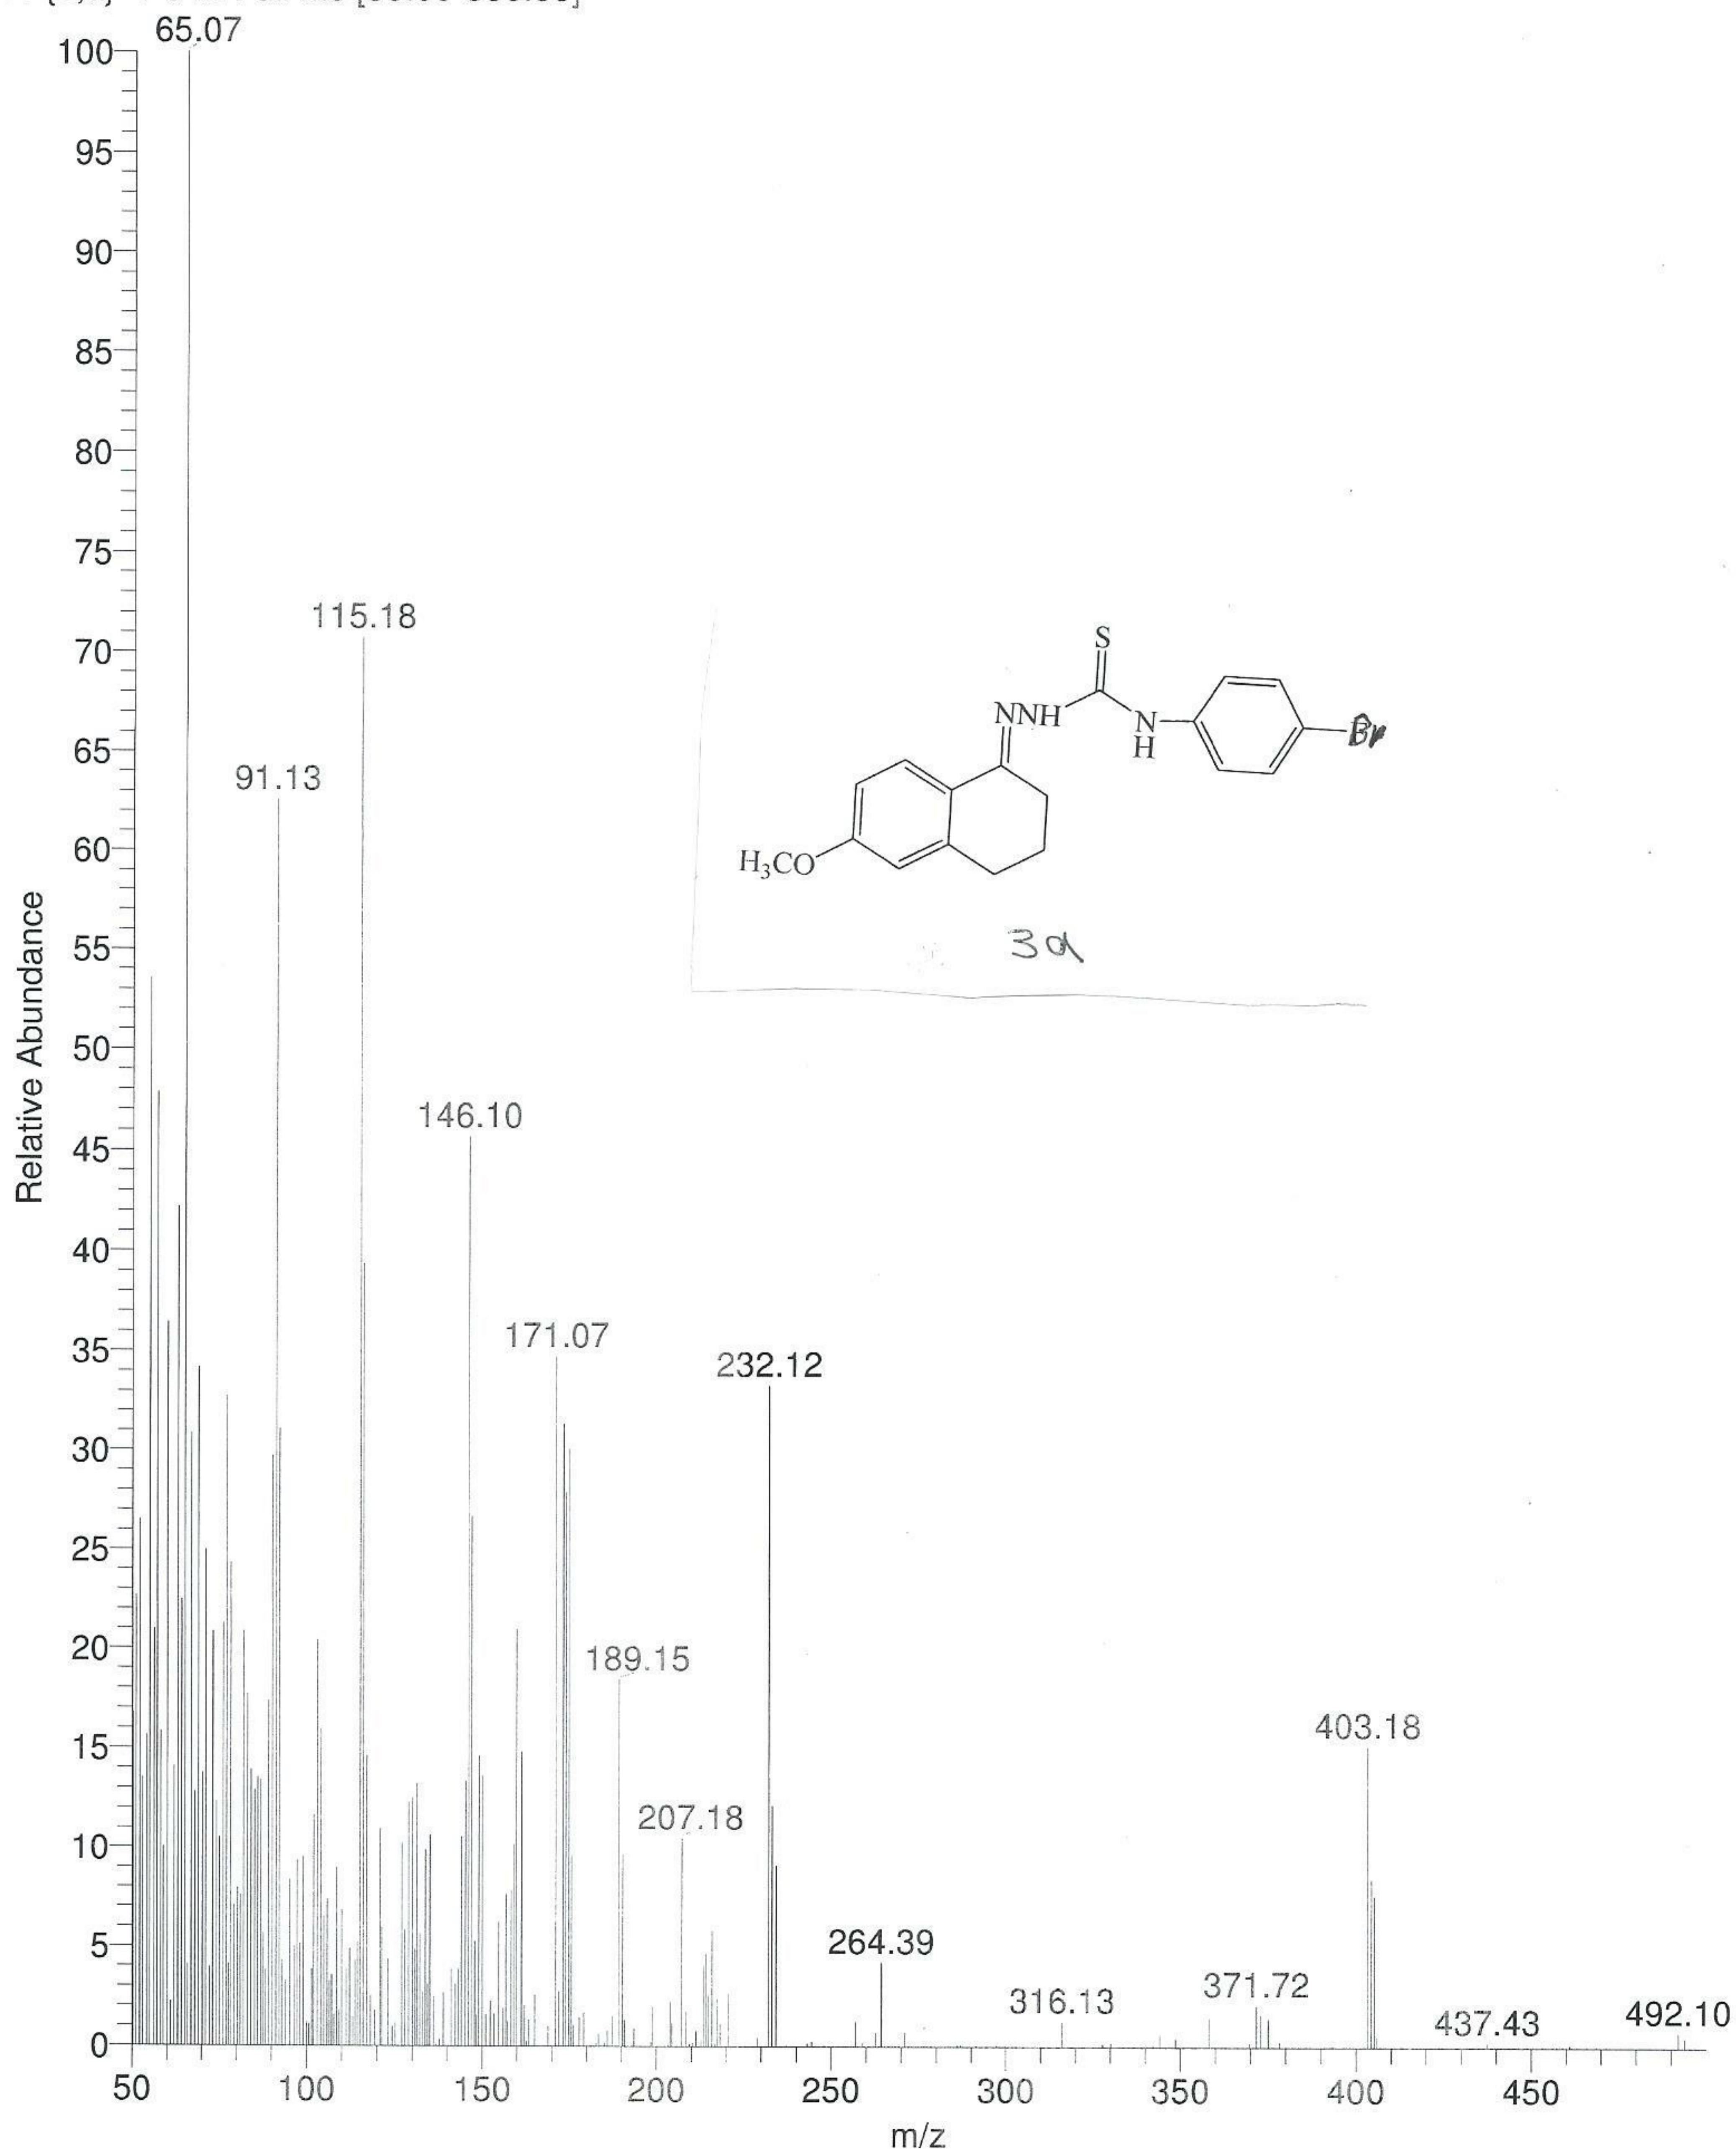

Current Data Parameters  
 NAME Nesreen Saied\_H\_3  
 EXPNO 10  
 PROCNO 1

F2 - Acquisition Parameters  
 Date\_ 20191002  
 Time 15.04  
 INSTRUM spect  
 PROBHD 5 mm PABBO BB/  
 PULPROG zg30  
 TD 65536  
 SOLVENT DMSO  
 NS 32  
 DS 2  
 SWH 8012.820 Hz  
 FIDRES 0.122266 Hz  
 AQ 4.0894465 sec  
 RG 32.12  
 DW 62.400 usec  
 DE 6.50 usec  
 IE 298.0 K  
 D1 1.0000000 sec  
 TD0 1

----- CHANNEL F1 -----  
 SFO1 400.1924713 MHz  
 NUC1 1H  
 P1 15.00 usec  
 PLW1 10.39999962 W

F2 - Processing parameters  
 SI 65536  
 SF 400.1900000 MHz  
 WDW EM  
 SSB 0  
 LB 0.30 Hz  
 GB 0  
 PC 1.00

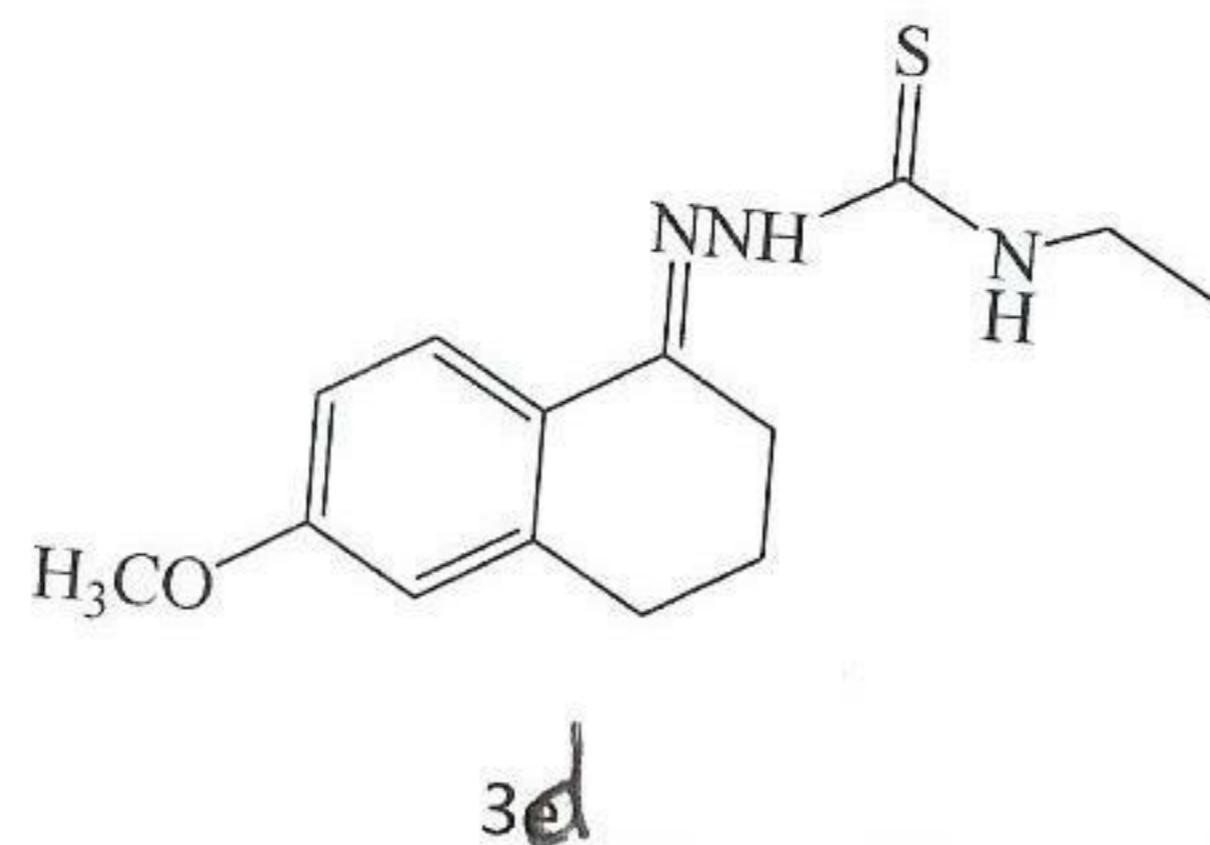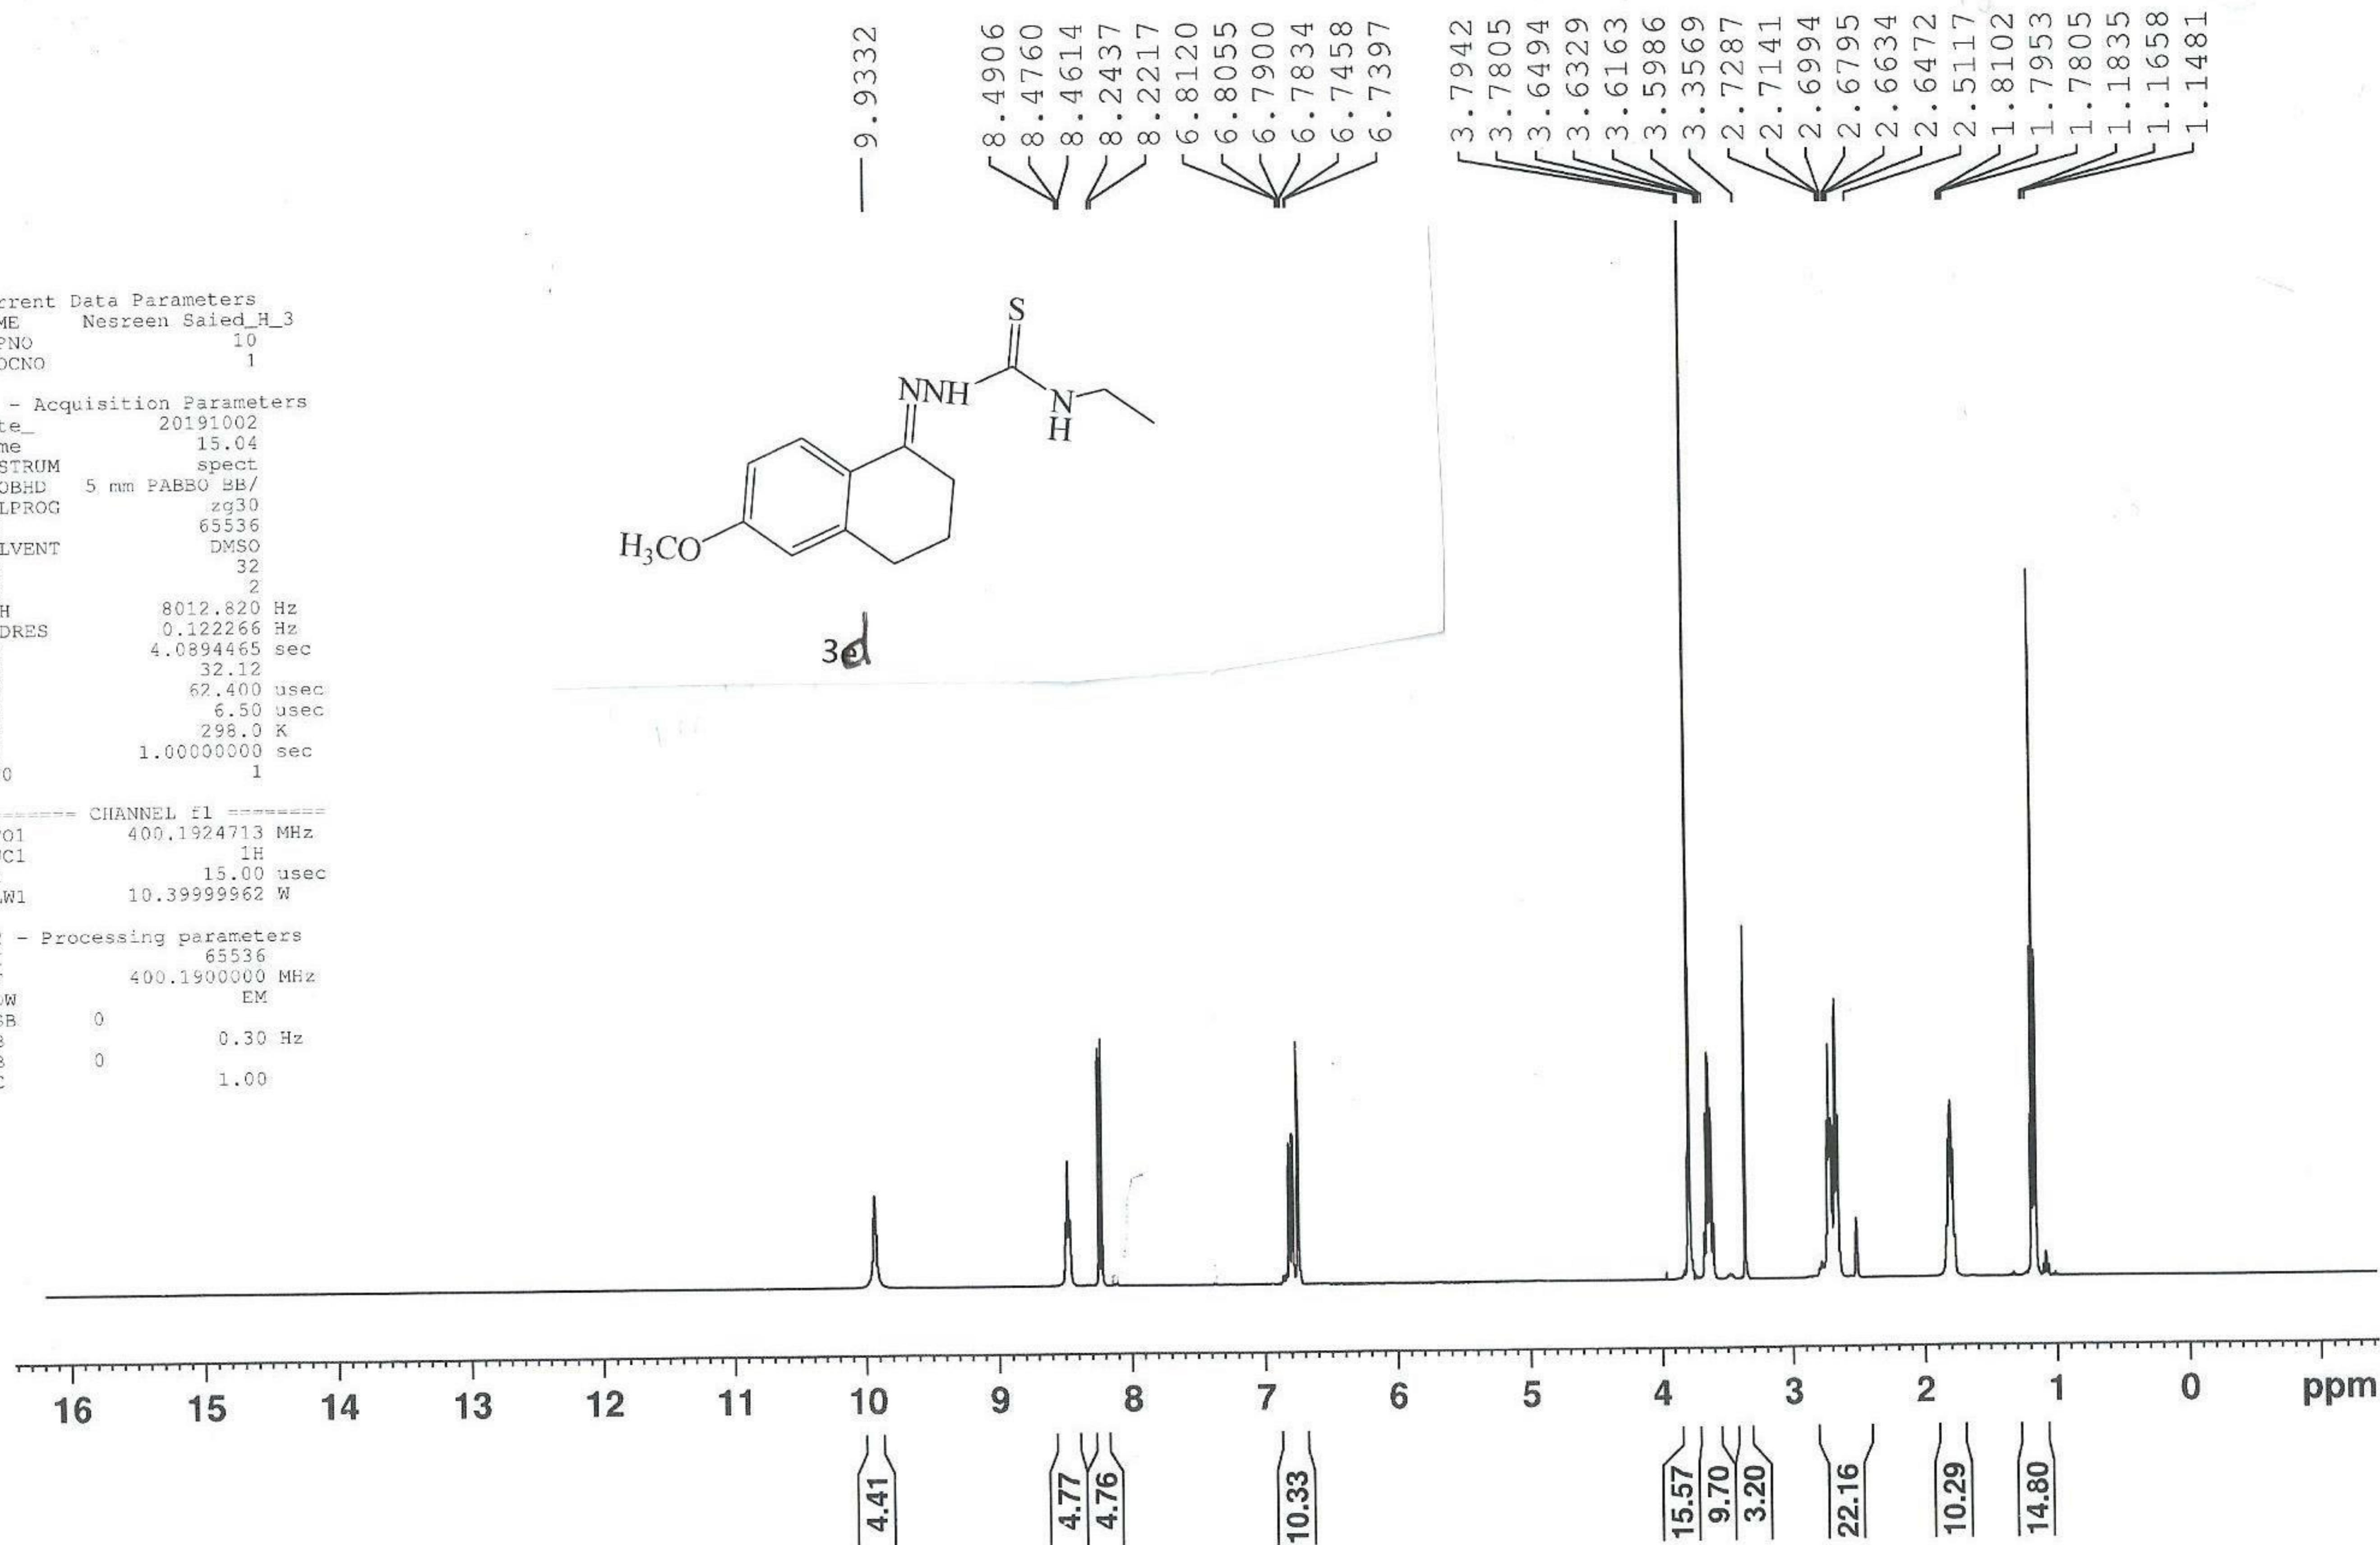

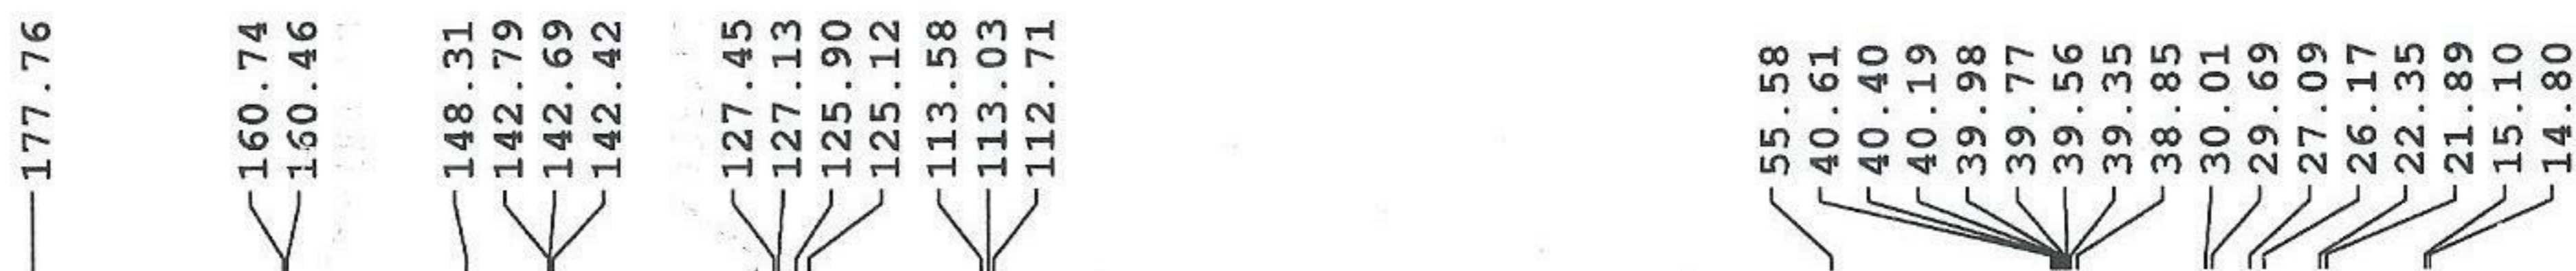

Current Data Parameters  
NAME Nesreen Saeed\_C\_3  
EXPNO 10  
PROCNO 1

F2 - Acquisition Parameters  
Date\_ 20191030  
Time 7.28  
INSTRUM spect  
PROBHD 5 mm PABBO BB/  
PULPROG zgpg30  
TD 65536  
SOLVENT DMSO  
NS 1200  
DS 4  
SWH 24038.461 Hz  
FIDRES 0.366798 Hz  
AQ 1.3631488 sec  
RG 202.37  
DW 20.800 usec  
DE 6.50 usec  
TE 298.0 K  
D1 2.00000000 sec  
D11 0.03000000 sec  
TD0 1

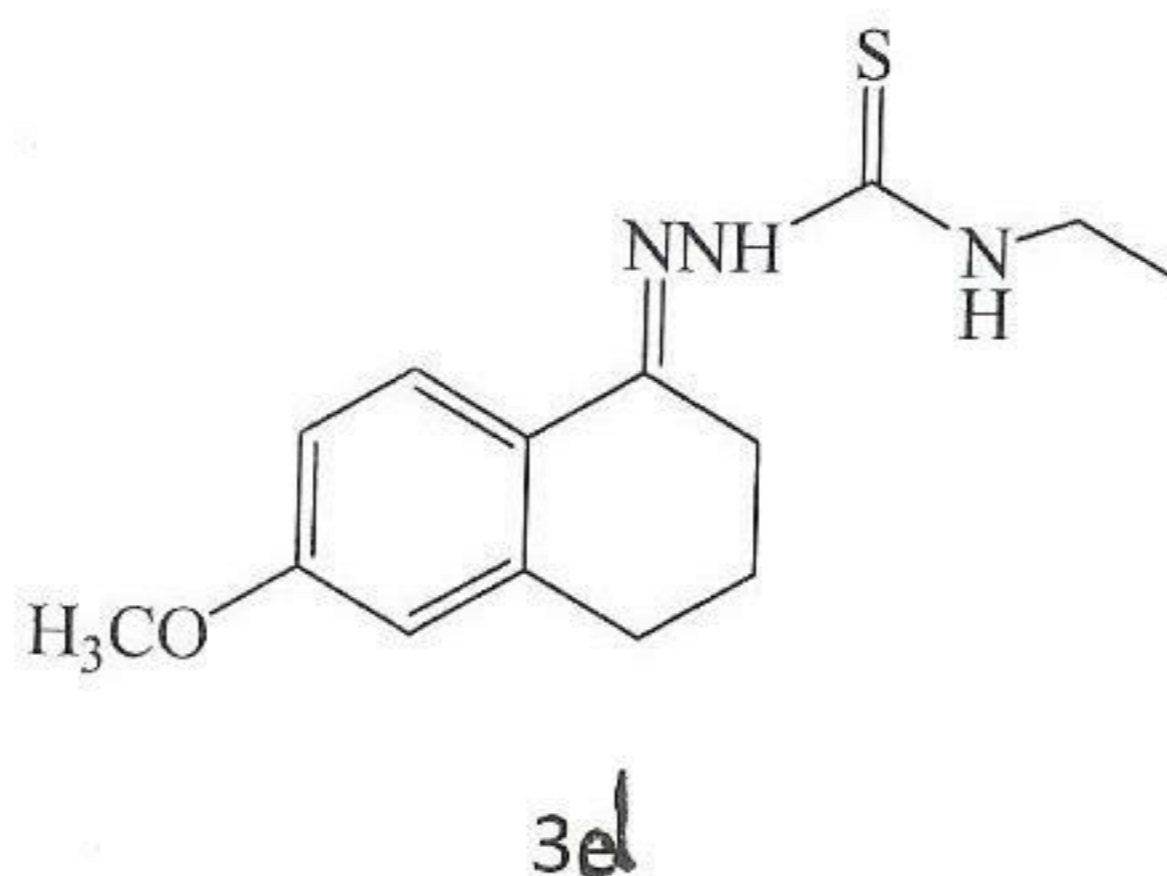

==== CHANNEL f1 =====  
SFO1 100.6379178 MHz  
NUC1 13C  
P1 10.00 usec  
PLW1 45.00000000 W  
  
==== CHANNEL f2 =====  
SFO2 400.1916008 MHz  
NUC2 1H  
CPDPRG[2] waltz16

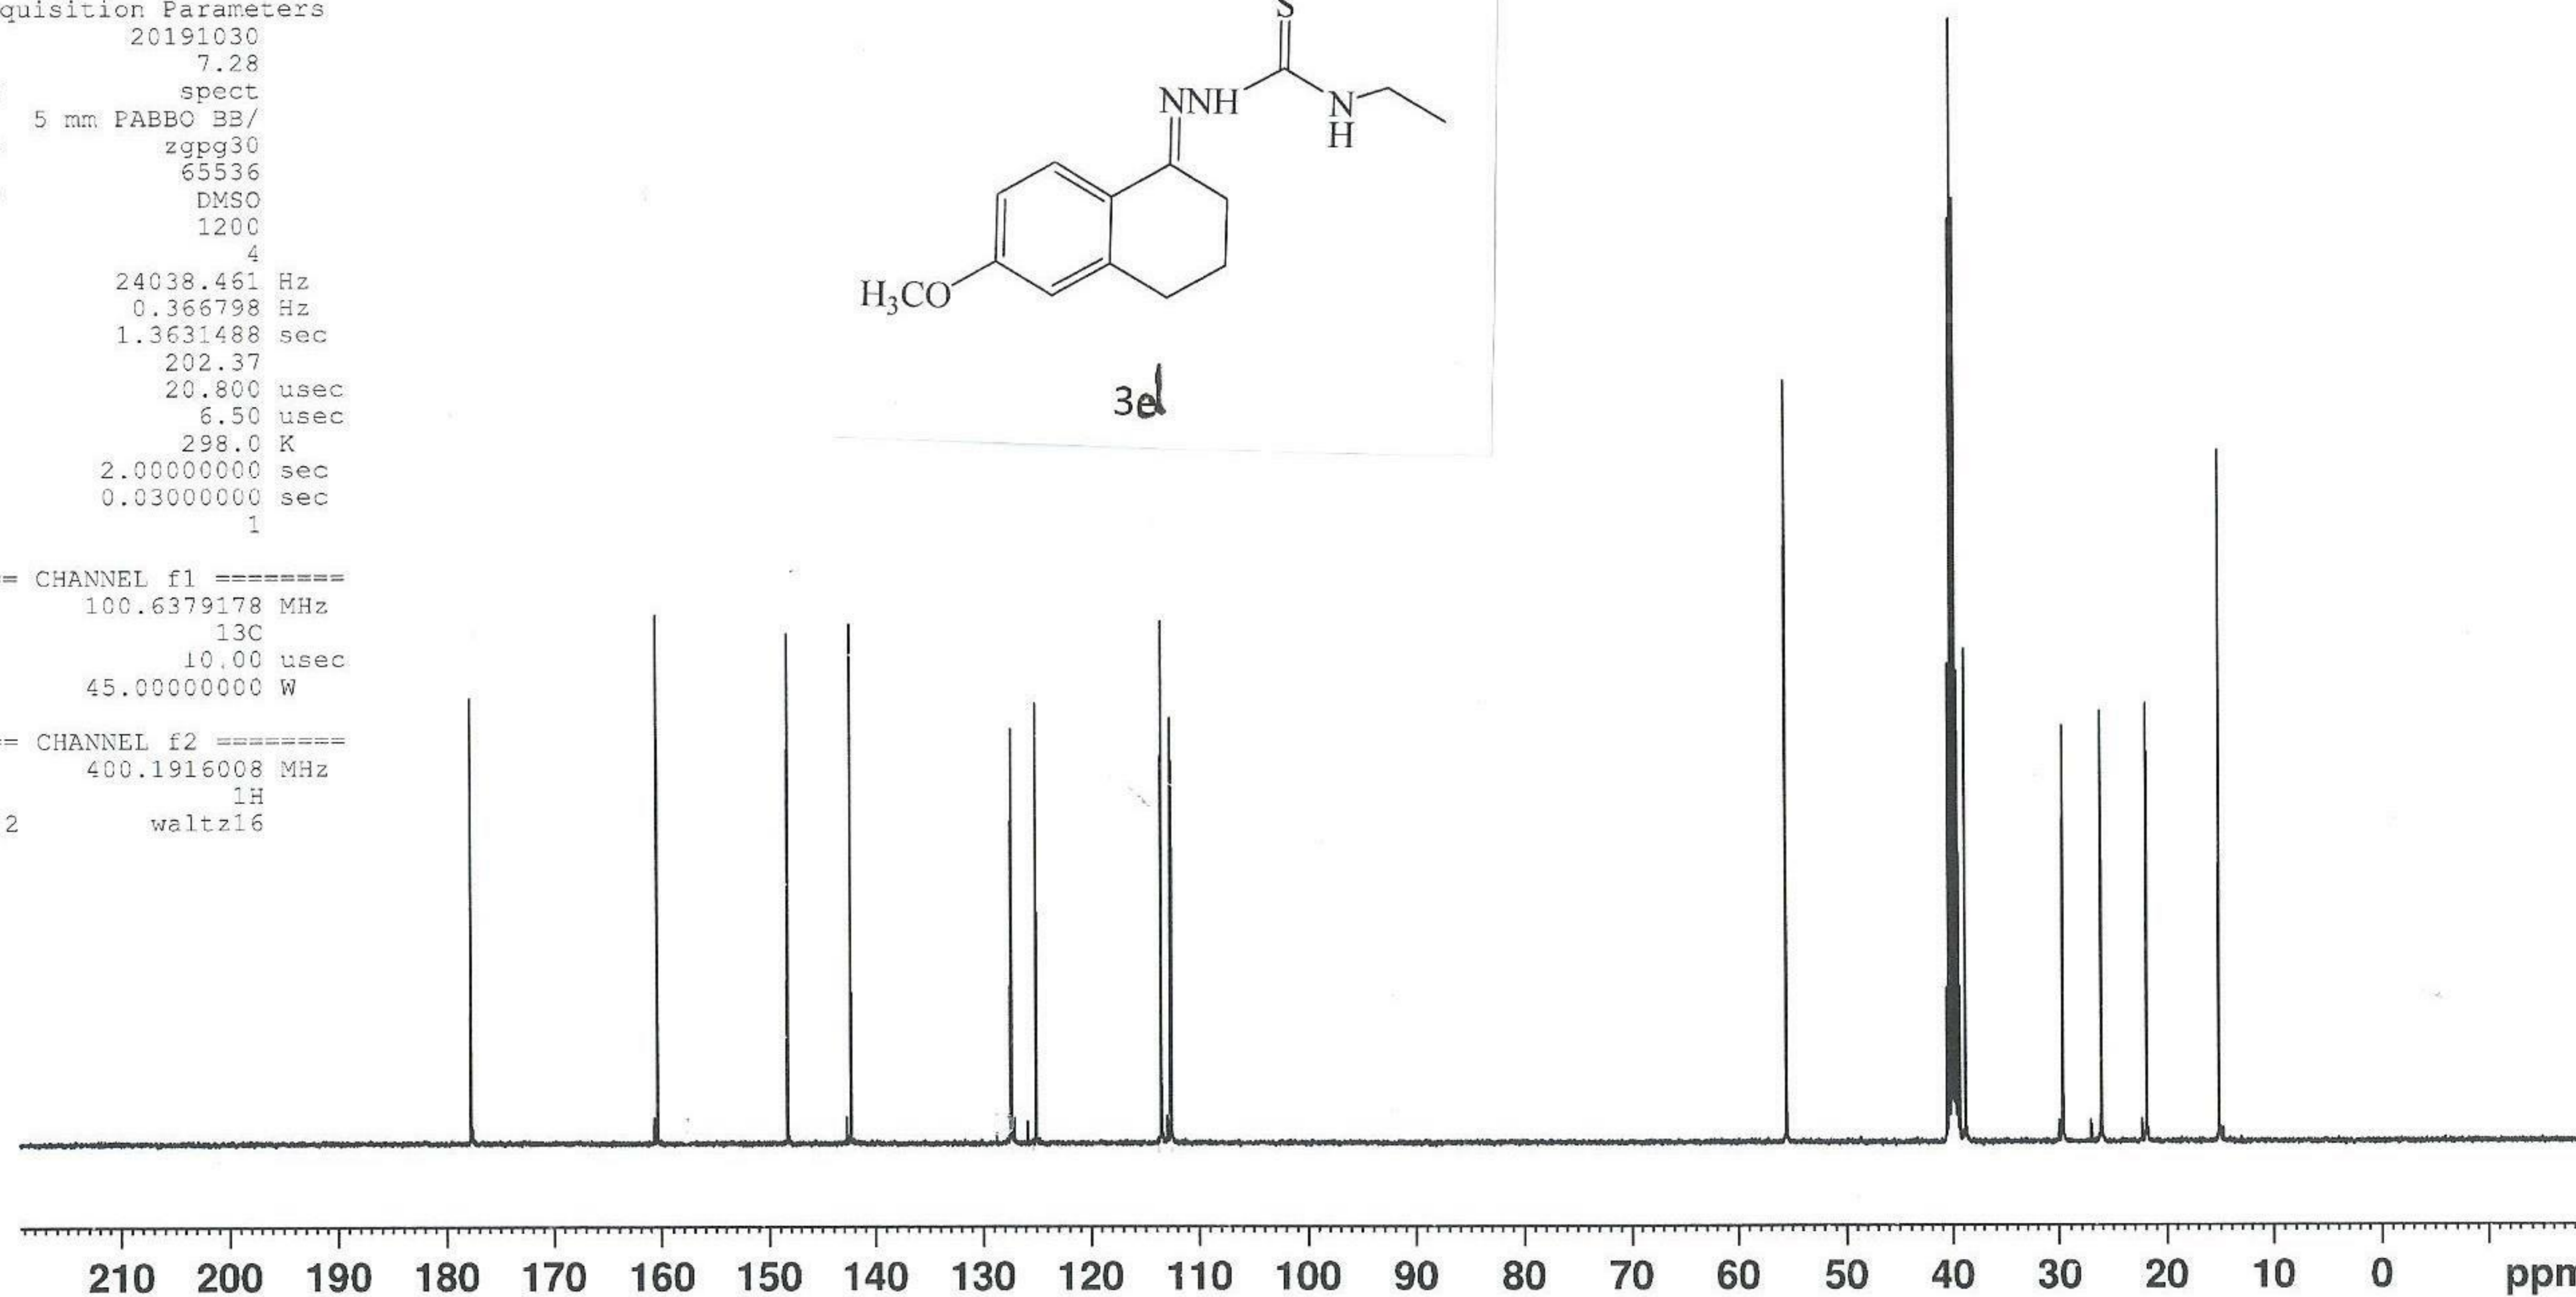

6

Alaa-4 #730 RT: 2.51 AV: 1 NL: 2.51E8  
T: {0,0} + c EI Full ms [50.00-500.00]

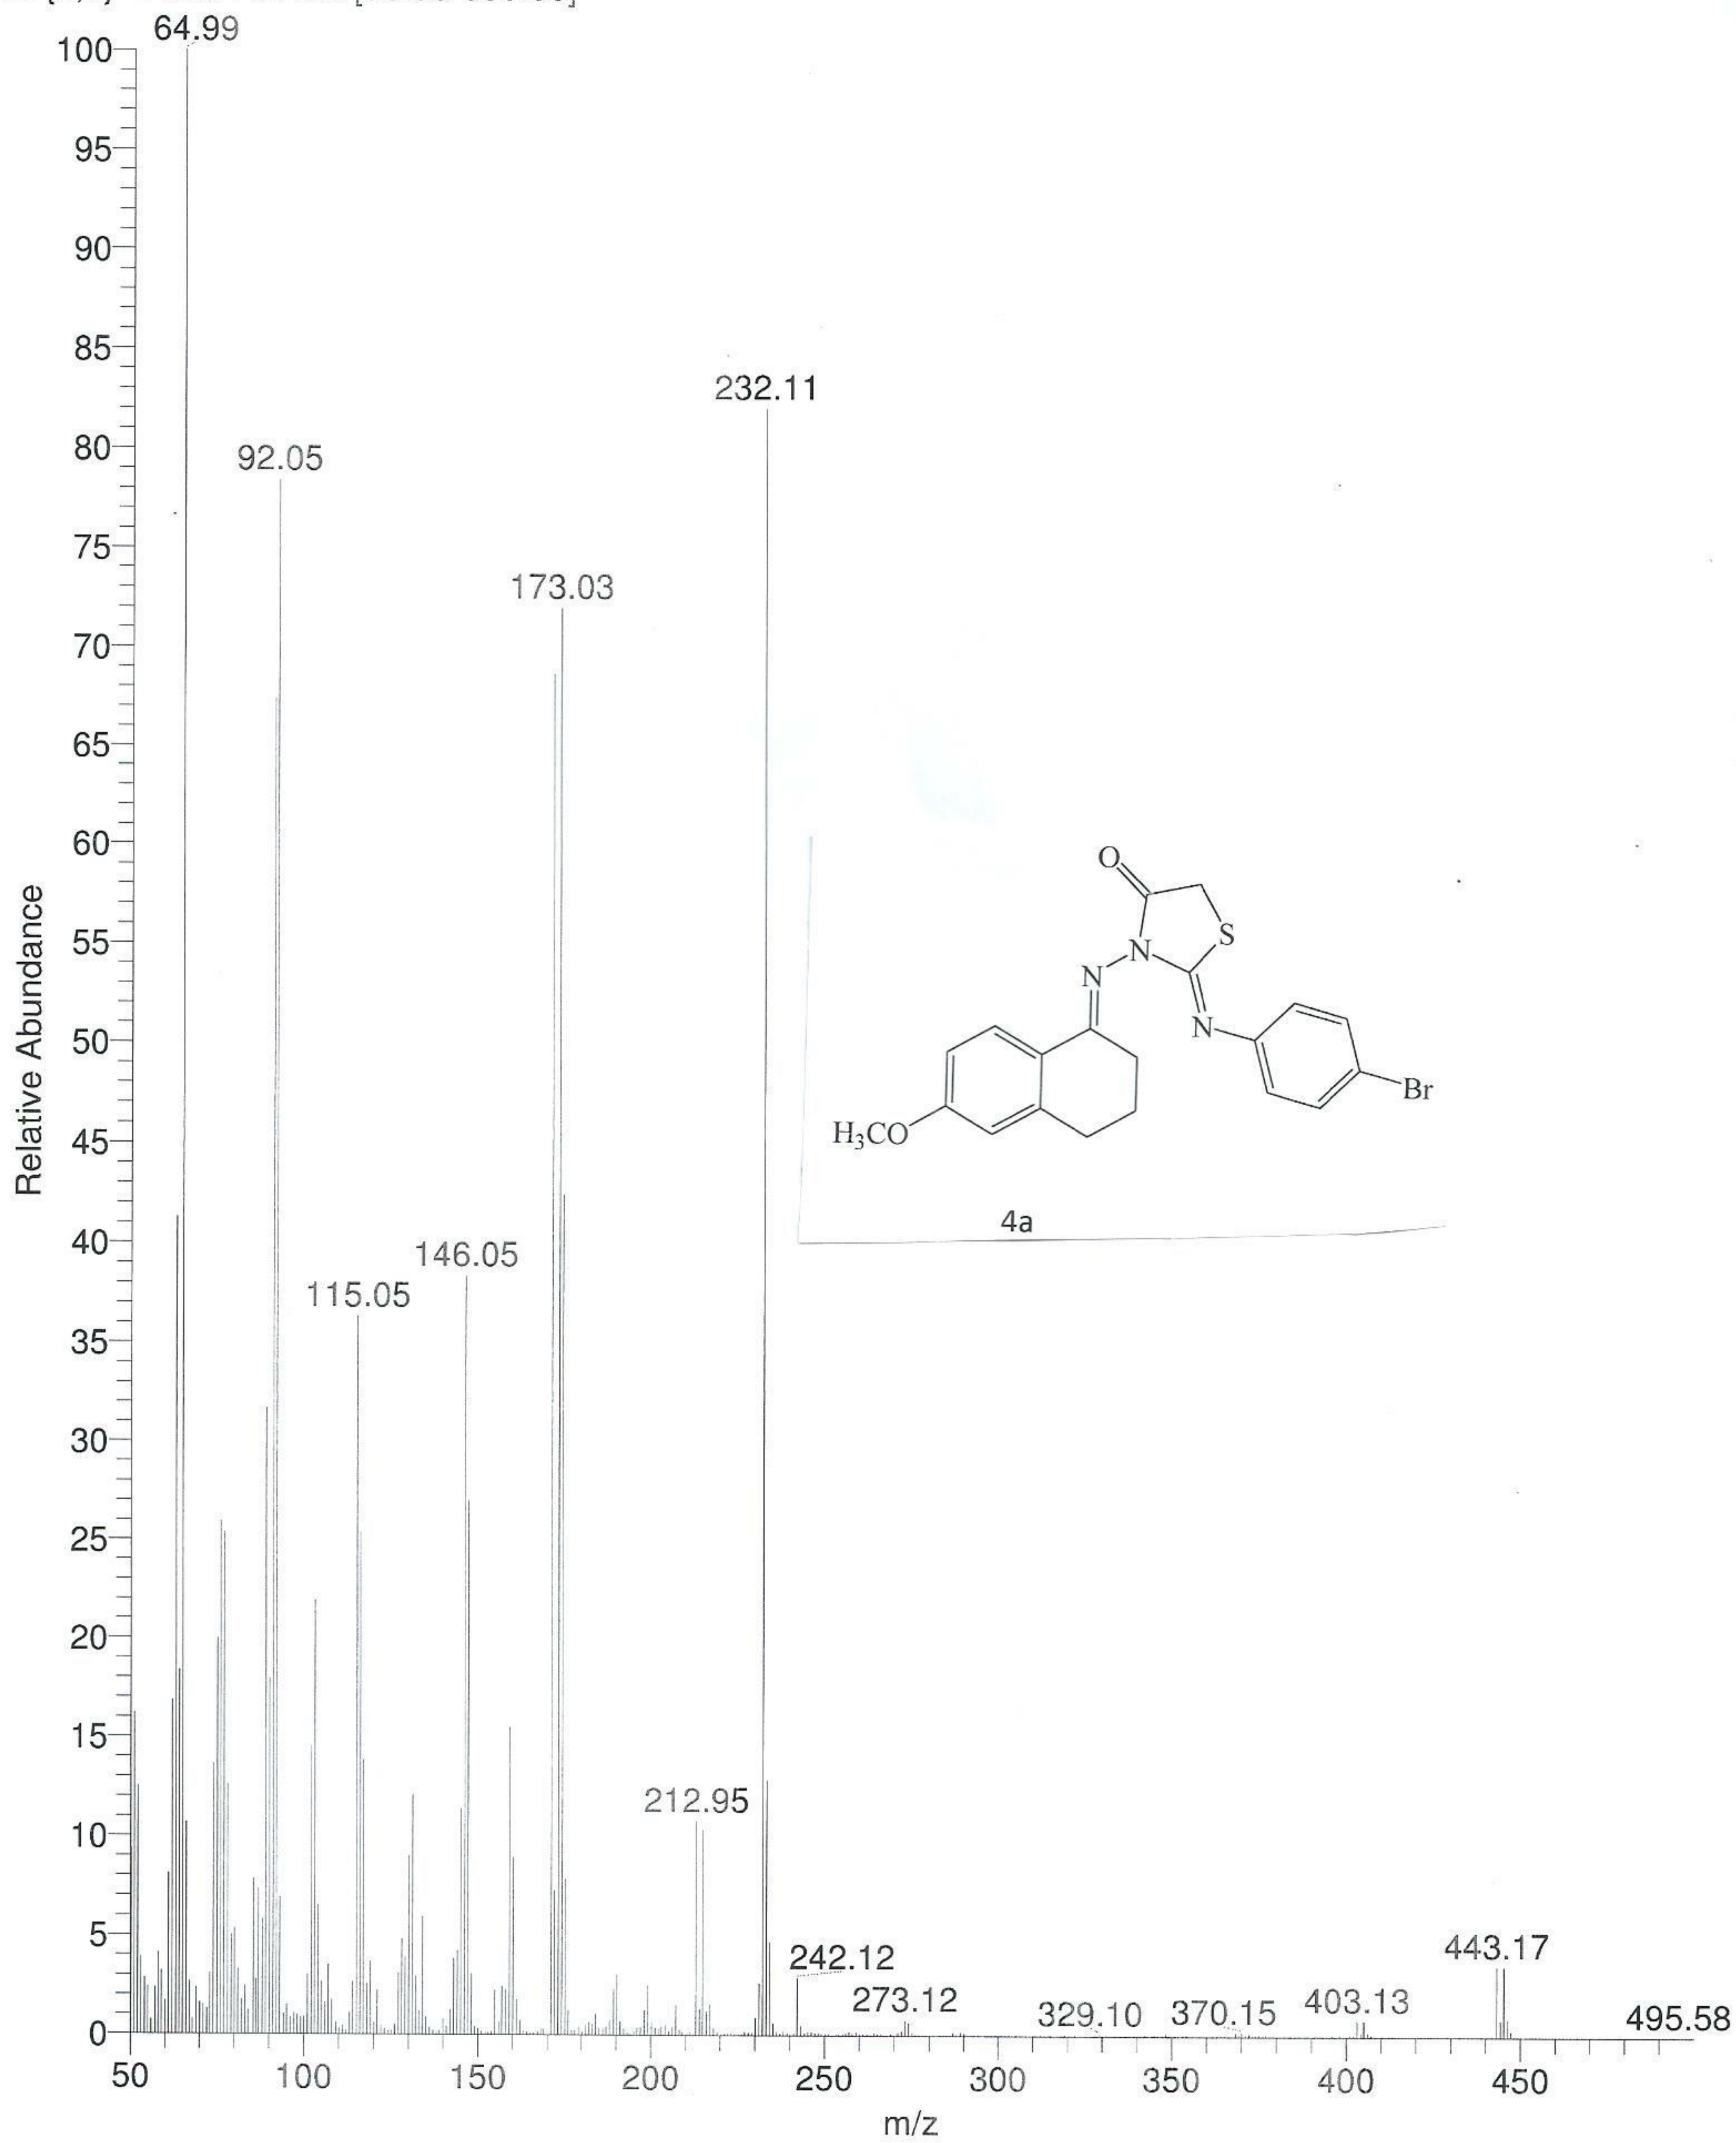

7

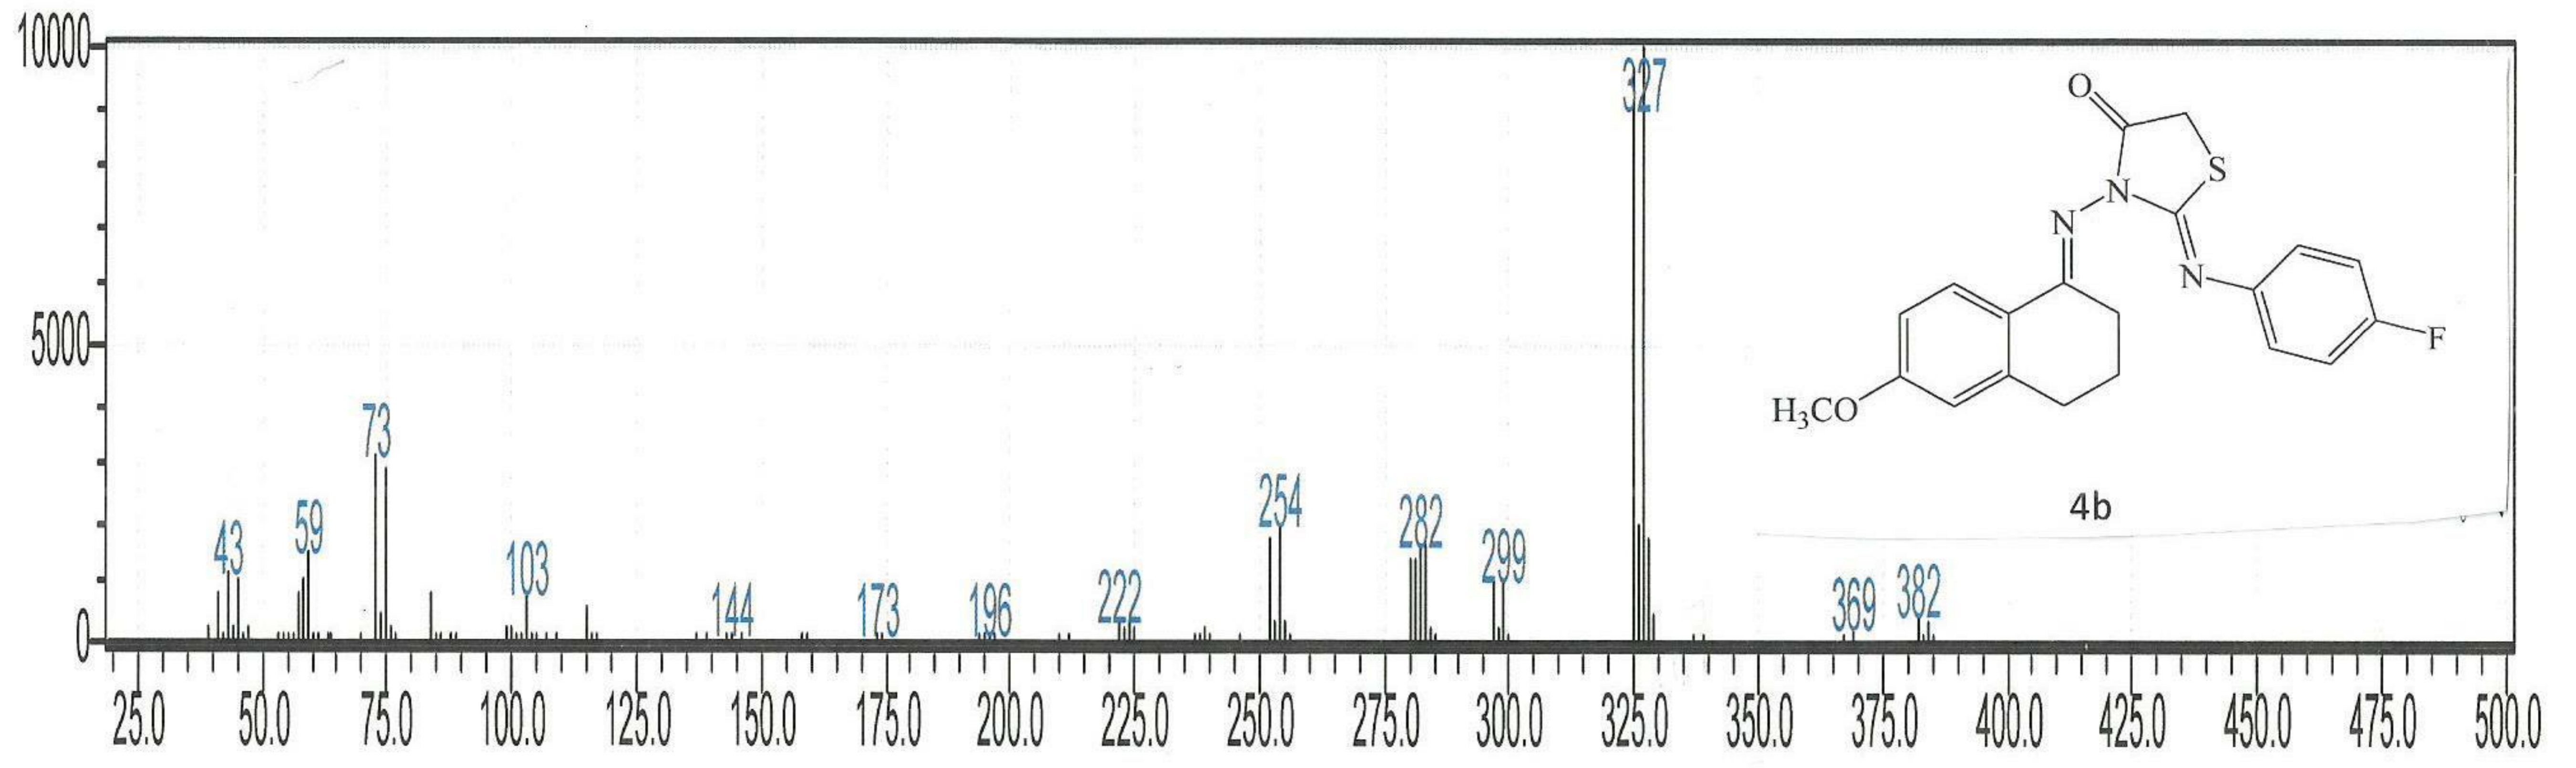

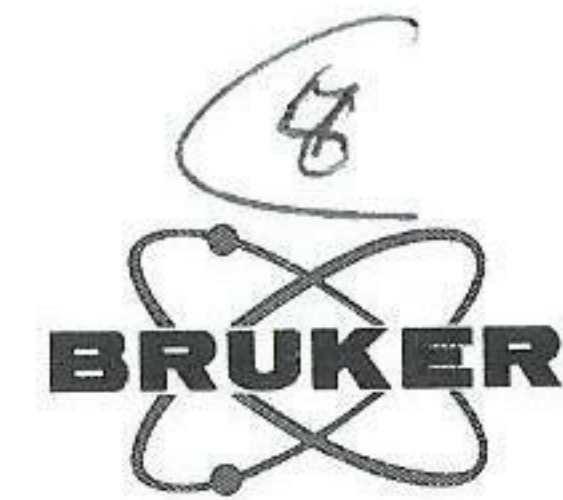

Current Data Parameters  
 NAME Nesreen Saieed\_H\_5  
 EXPNO 10  
 PROCNO 1

F2 - Acquisition Parameters  
 Date\_ 20190806  
 Time 16.25  
 INSTRUM spect  
 PROBHD 5 mm PABBO BB/  
 PULPROG zg30  
 TD 65536  
 SOLVENT DMSO  
 NS 32  
 DS 2  
 SWH 8012.820 Hz  
 FIDRES 0.122266 Hz  
 AQ 4.0894465 sec  
 RG 169.46  
 DW 62.400 usec  
 DE 6.50 usec  
 TE 298.0 K  
 D1 1.00000000 sec  
 TD0 1

----- CHANNEL f1 -----  
 SF01 400.1924713 MHz  
 NUC1 1H  
 P1 15.00 usec  
 PLW1 10.39999962 W

F2 - Processing parameters  
 SI 65536  
 SF 400.1900000 MHz  
 WDW EM  
 SSB 0  
 LB 0.30 Hz  
 GB 0  
 PC 1.00

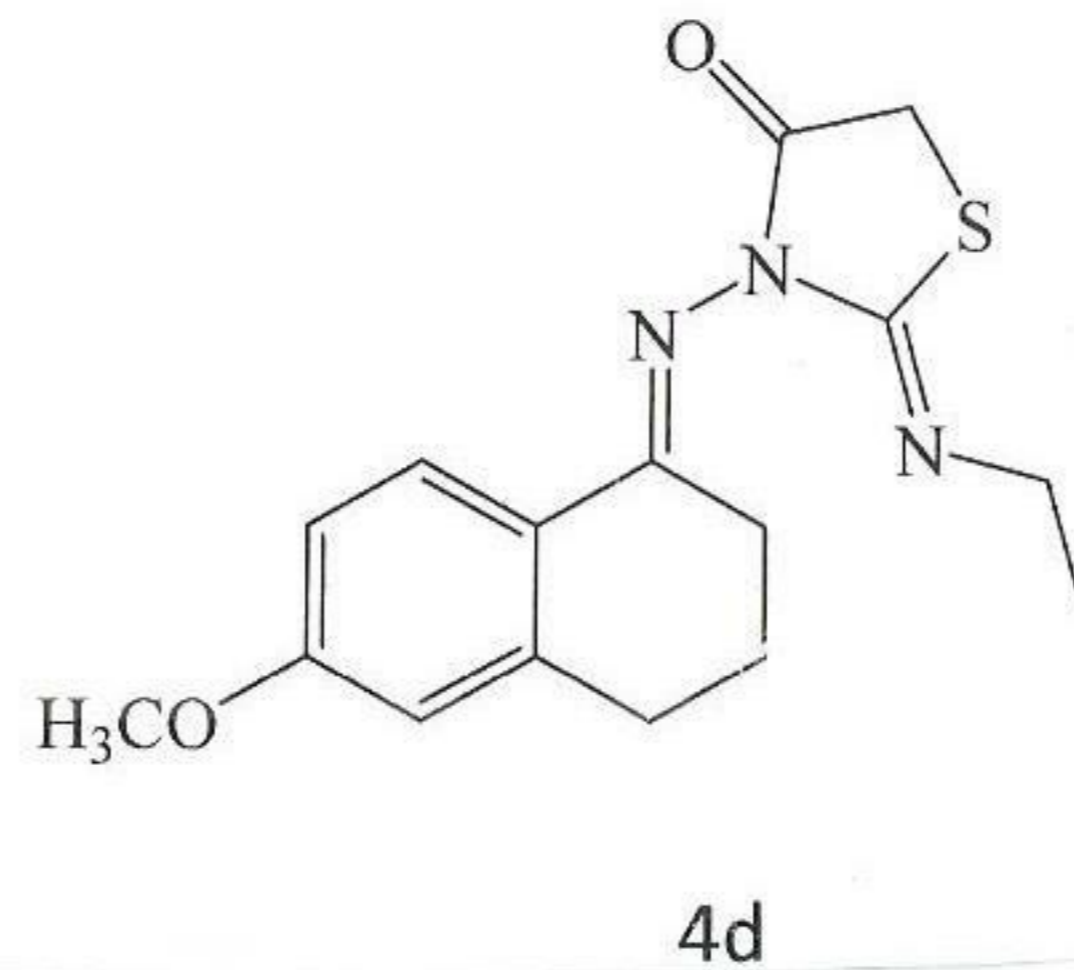

8.0539  
 8.0320  
 6.8761  
 6.8696  
 6.8541  
 6.8476  
 6.7942  
 6.7881  
 3.9288  
 3.7942  
 3.7847  
 3.7667  
 3.7490  
 3.3286  
 2.8698  
 2.8539  
 2.8376  
 2.7977  
 2.7831  
 2.7682  
 2.5150  
 2.5107  
 2.5065  
 1.8588  
 1.8430  
 1.8279  
 1.8129  
 1.7970  
 1.2201  
 1.2024  
 1.1847

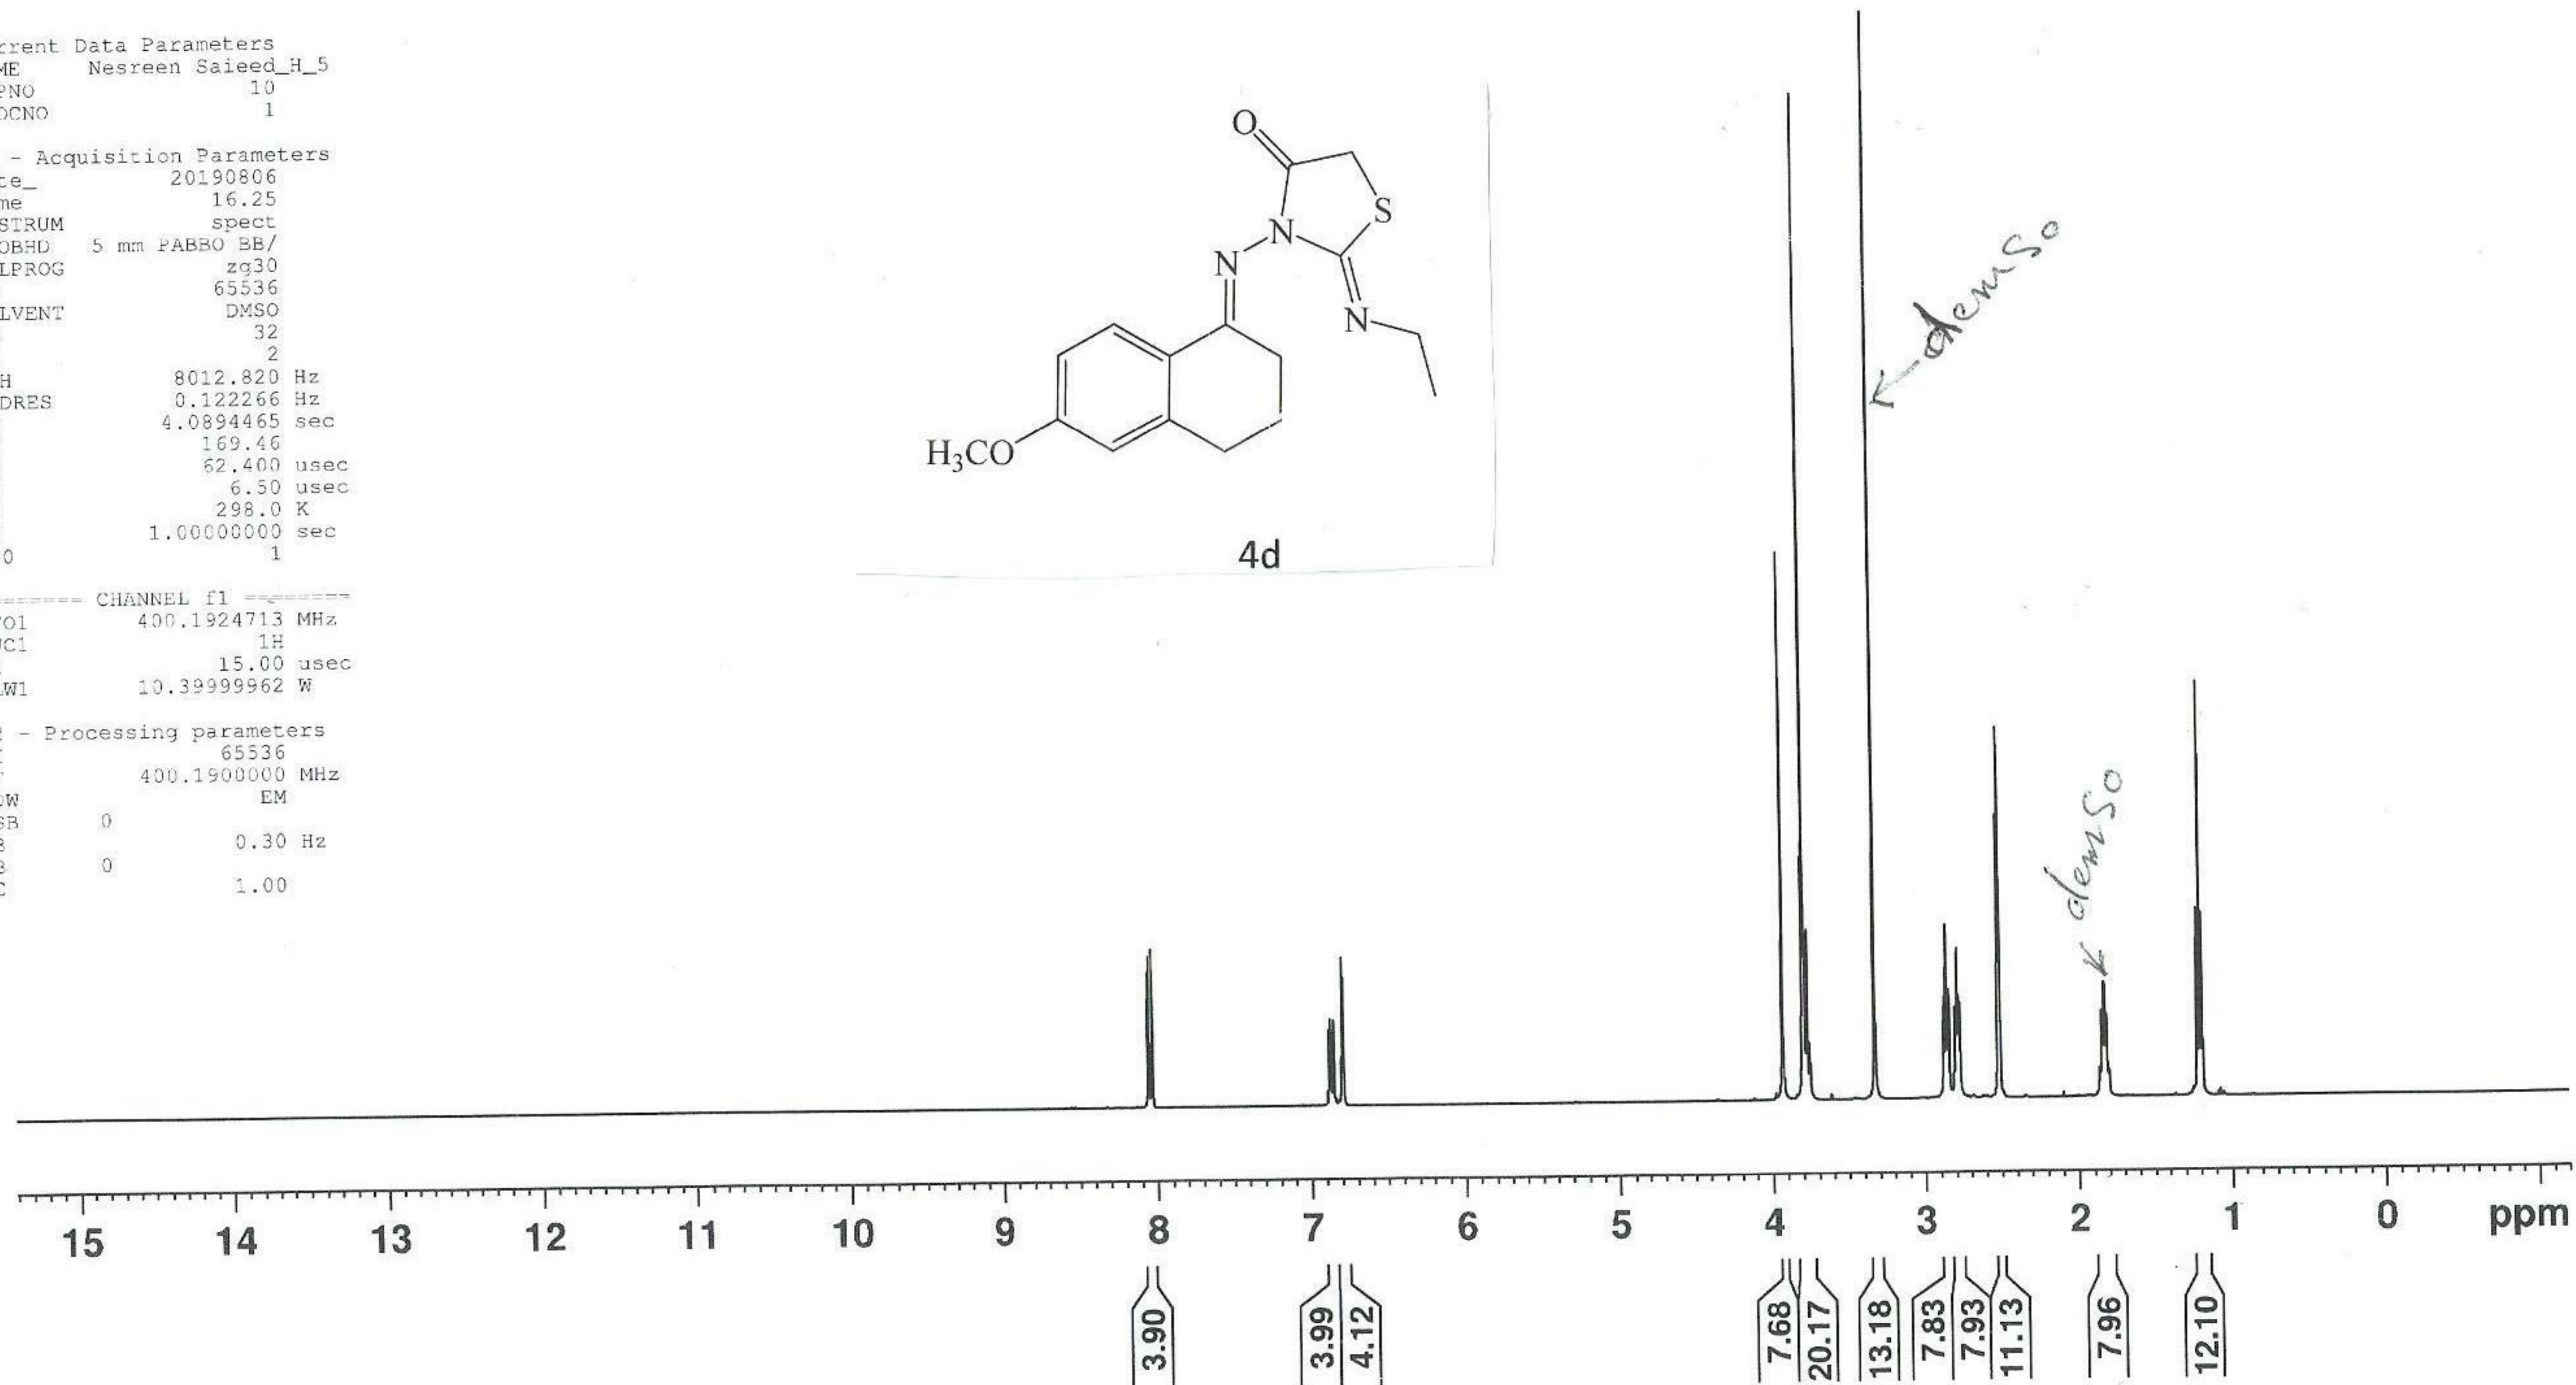



Nesreen Saeed\_C\_5

Microanalytical Unit - FOPCU - NMR laboratory  
www.pharma.cu.edu.eg dir-mau.fopcu@pharma.cu.edu.eg

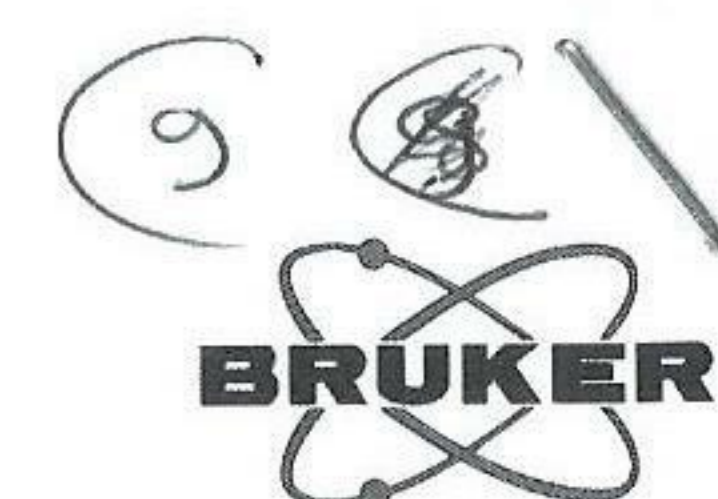

172.39  
161.36  
161.17  
161.04  
143.12  
126.88  
125.28  
113.65  
113.06  
55.63  
40.37  
40.16  
39.95  
39.74  
39.53  
39.32  
39.11  
38.28  
32.49  
29.95  
27.19  
22.27  
12.65

Current Data Parameters  
NAME Nesreen Saeed\_C\_5  
EXPNO 10  
PROCNO 1

F2 - Acquisition Parameters  
Date\_ 20190907  
Time 11.40  
INSTRUM spect  
PROBHD 5 mm PABBO BB/  
PULPROG zgpg30  
TD 65536  
SOLVENT DMSO  
NS 1200  
DS 4  
SWH 24038.461 Hz  
FIDRES 0.366798 Hz  
AQ 1.3631488 sec  
RG 202.37  
DW 20.800 usec  
DE 6.50 usec  
TE 298.1 K  
D1 2.00000000 sec  
D11 0.03000000 sec  
TD0 1

==== CHANNEL f1 =====  
SFO1 100.6379178 MHz  
NUC1 13C  
P1 10.00 usec  
PLW1 45.00000000 W

==== CHANNEL f2 =====  
SFO2 400.1916008 MHz  
NUC2 1H  
CPDPRG[2] waltz16

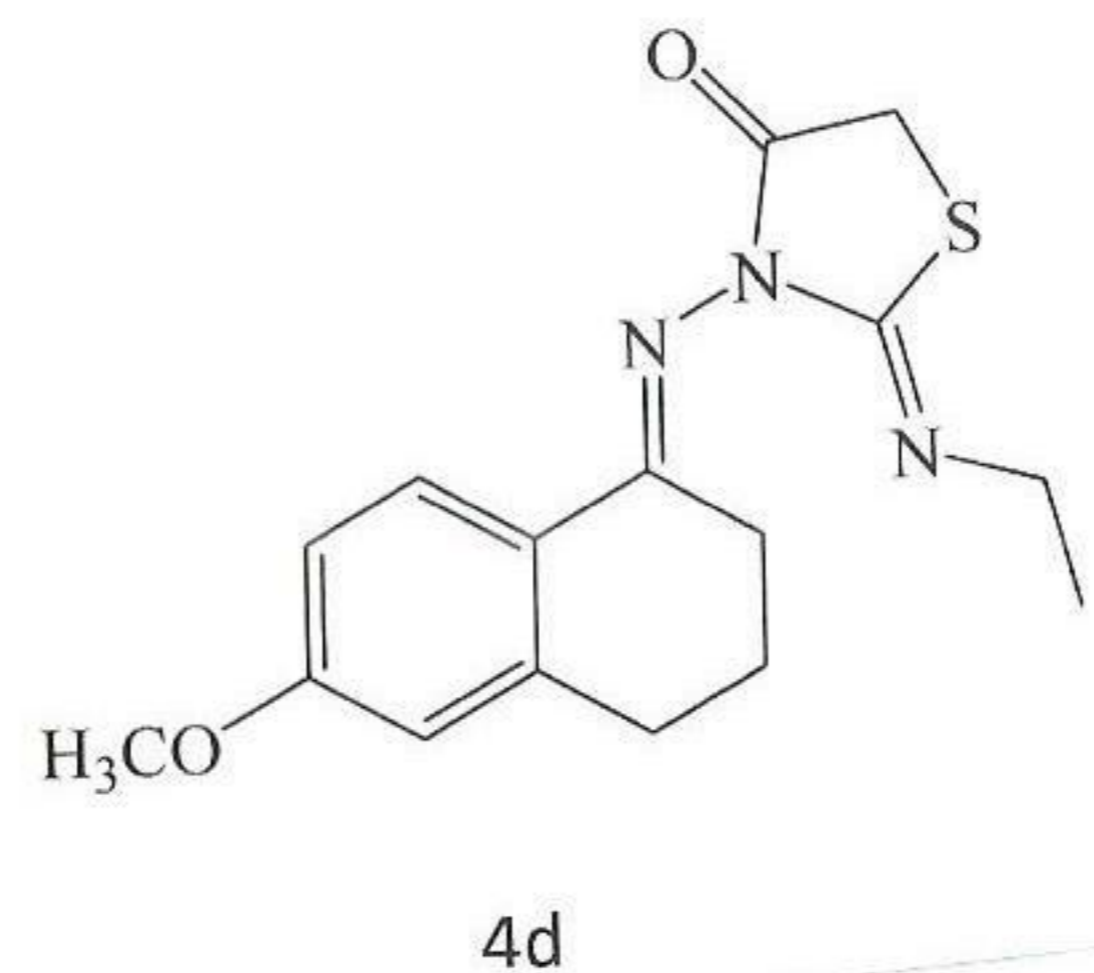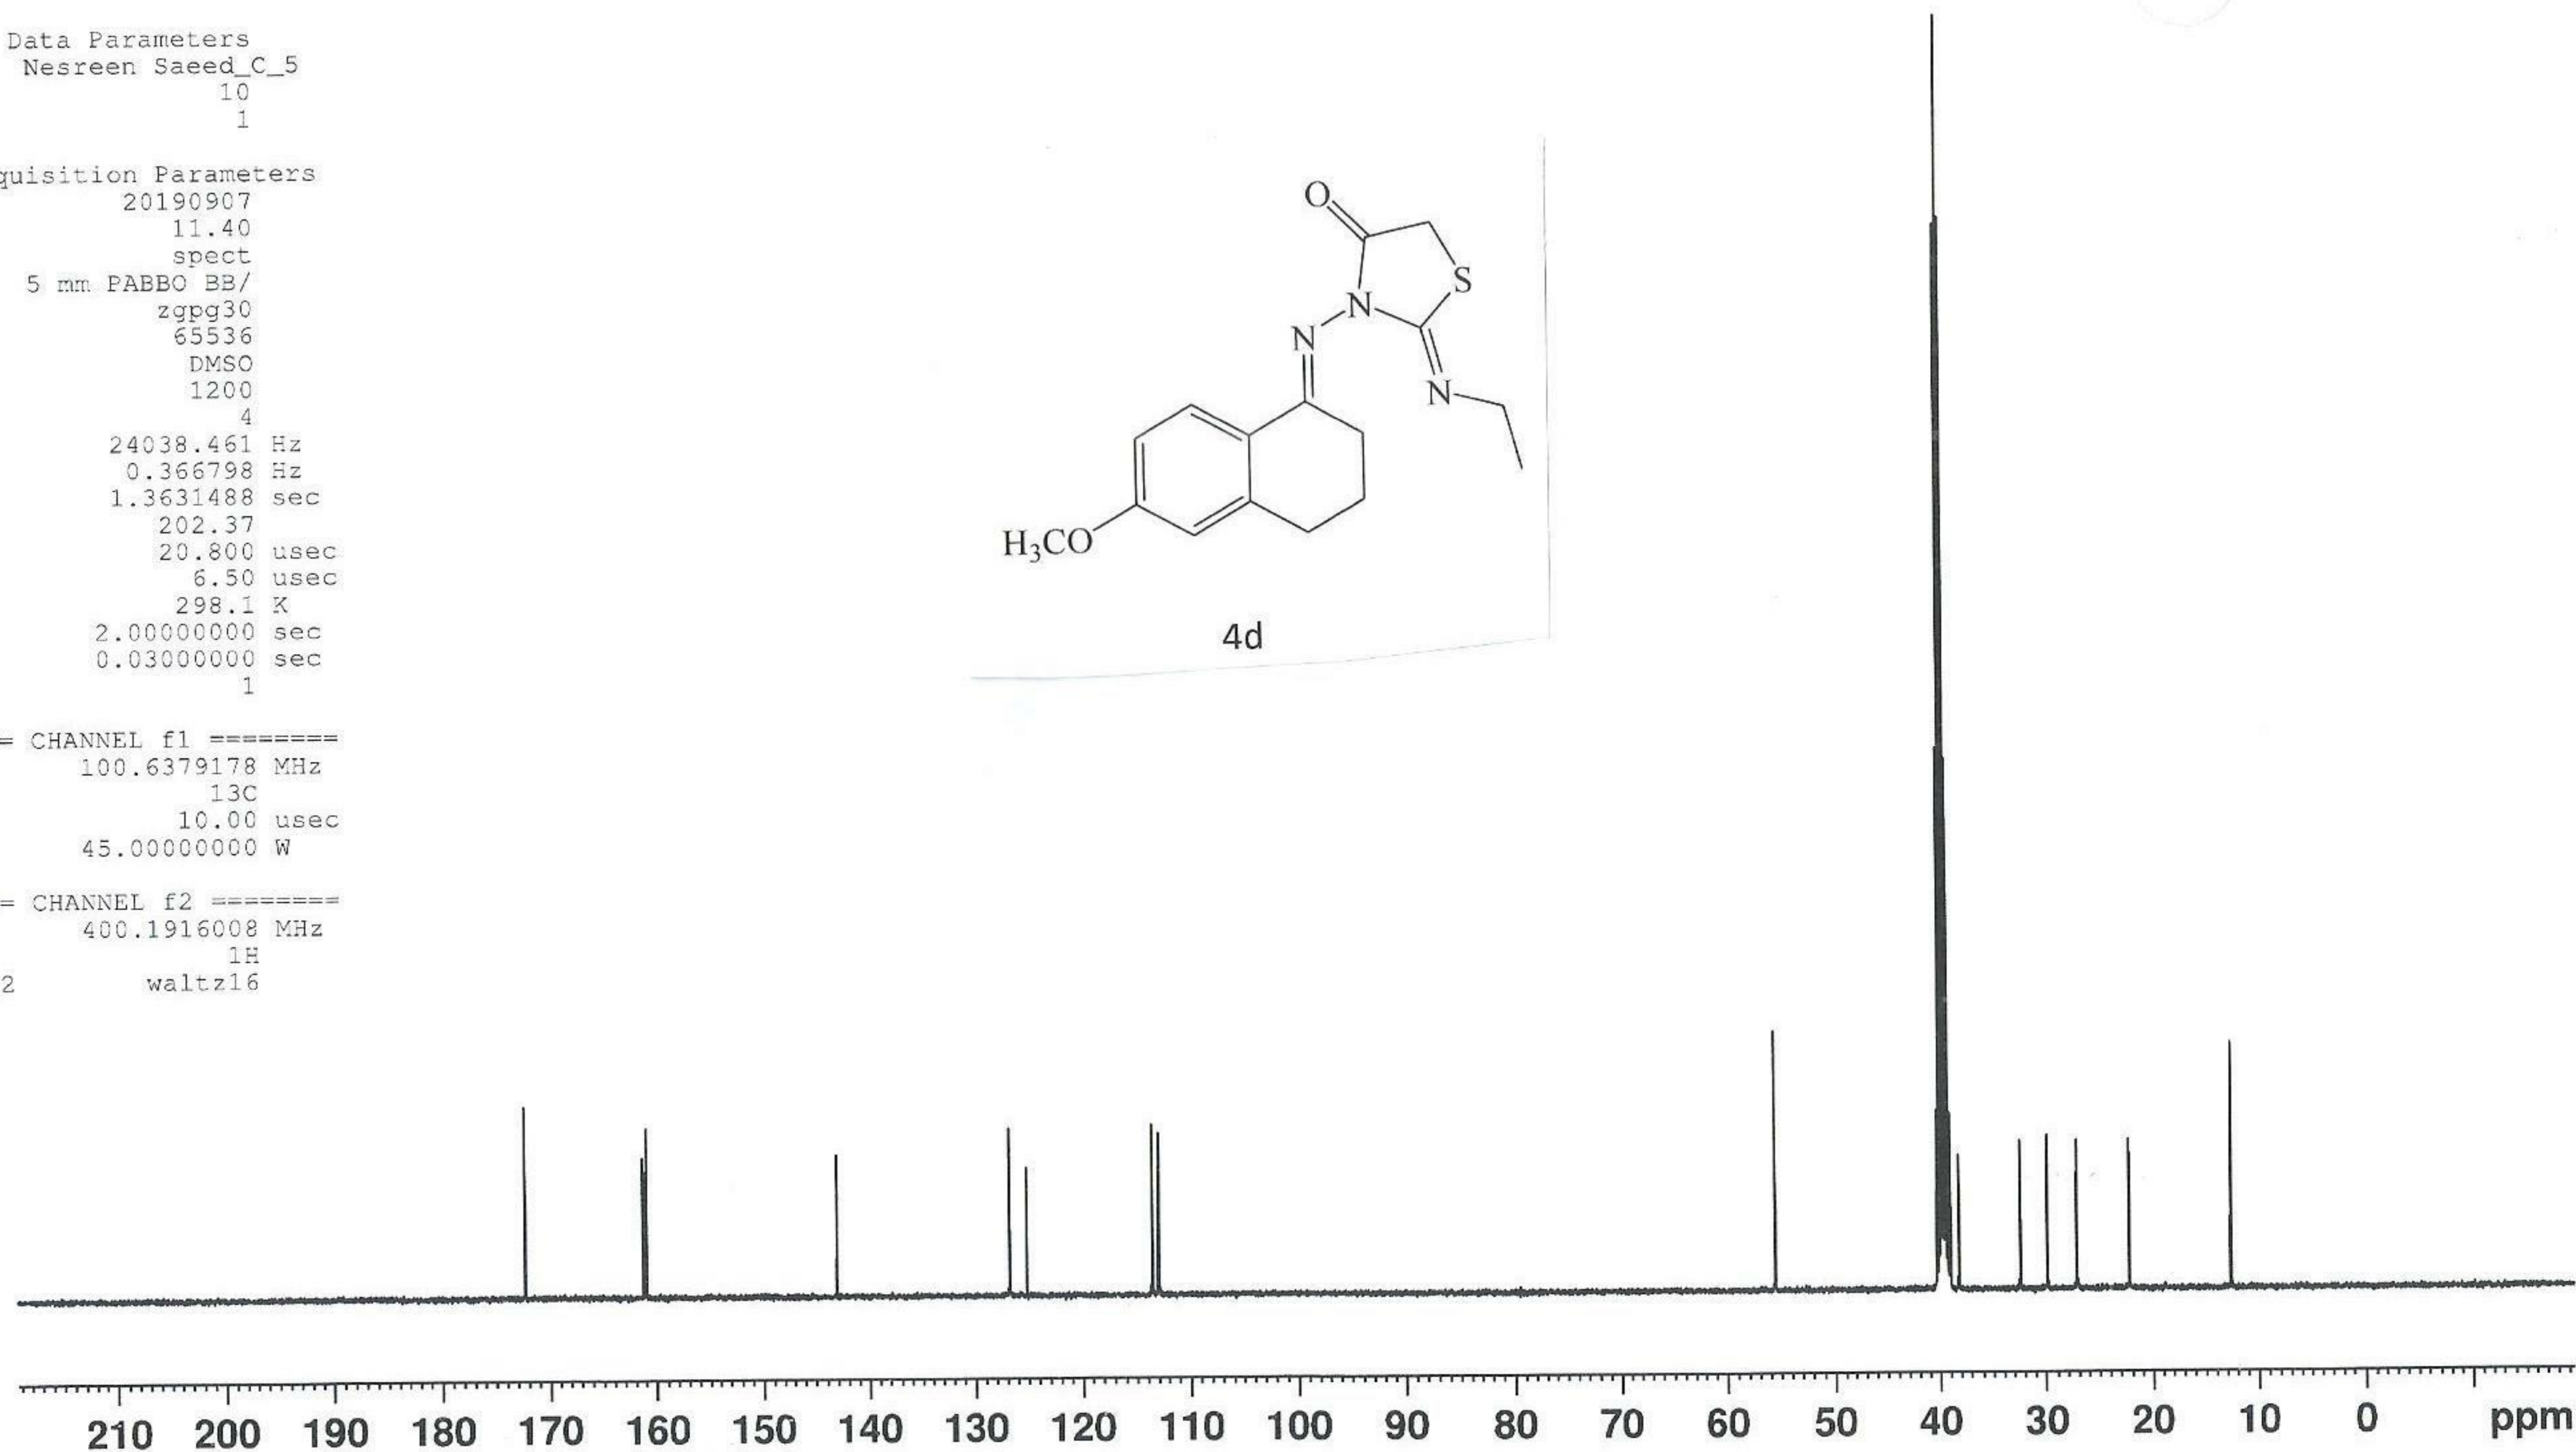

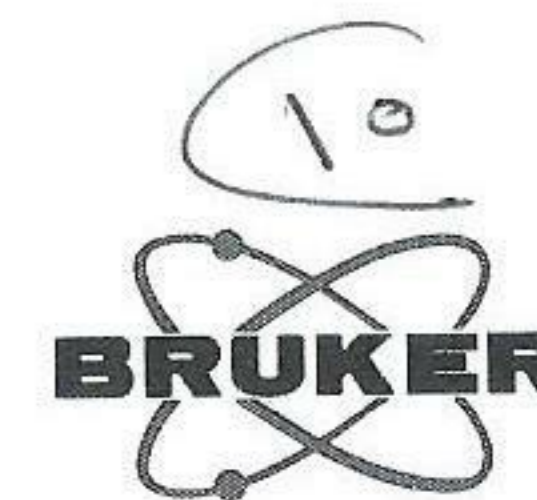

8.0570  
 8.0349  
 7.4811  
 7.4612  
 7.4416  
 7.4240  
 7.4020  
 7.2388  
 7.2203  
 7.2019  
 7.1324  
 7.1180  
 7.1134  
 7.0963  
 6.8753  
 6.8692  
 6.8533  
 6.8472  
 6.7719  
 6.7666  
 4.0659  
 3.7867  
 3.7421  
 3.4838  
 3.3966  
 2.7461  
 2.7317  
 2.7171  
 2.5918  
 2.5763  
 2.5603  
 2.5118

Current Data Parameters  
 NAME Nesreen Saied\_H\_I  
 EXPNO 50  
 PROCNO 1

F2 - Acquisition Parameters  
 Date\_ 20191002  
 Time 14.39  
 INSTRUM spect  
 PROBHD 5 mm PABBO BB/  
 PULPROG zg30  
 TD 65536  
 SOLVENT DMSO  
 NS 32  
 DS 2  
 SWH 8012.820 Hz  
 FIDRES 0.122266 Hz  
 AQ 4.0894465 sec  
 RC 180.8  
 DW 62.400 usec  
 DE 6.50 usec  
 TE 298.1 K  
 D1 1.00000000 sec  
 TD0 1

CHANNEL f1  
 SF01 400.1924713 MHz  
 NUCL1 1H  
 P1 15.00 usec  
 PLW1 10.39999962 W

F2 - Processing parameters  
 SI 65536  
 SF 400.1900000 MHz  
 WLW EM  
 SSB 0  
 LB 0.30 Hz  
 GB 0  
 PC 1.00

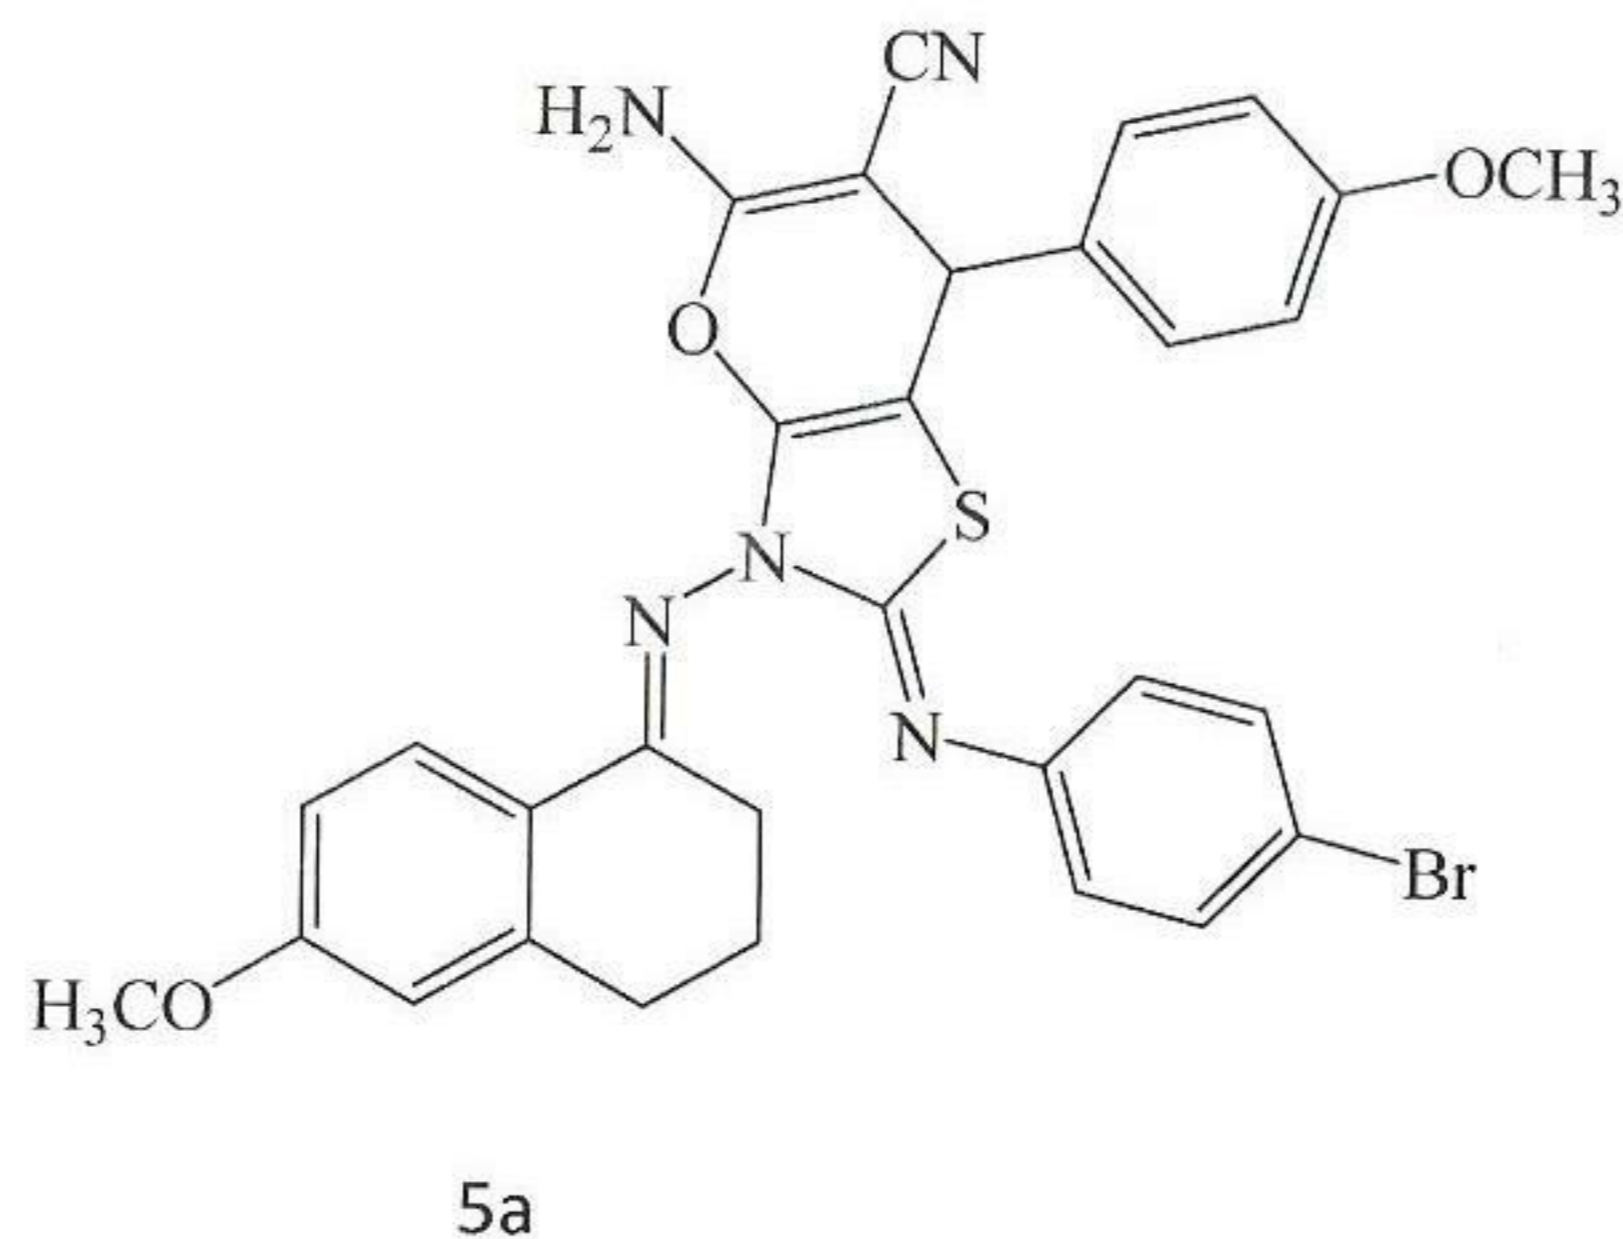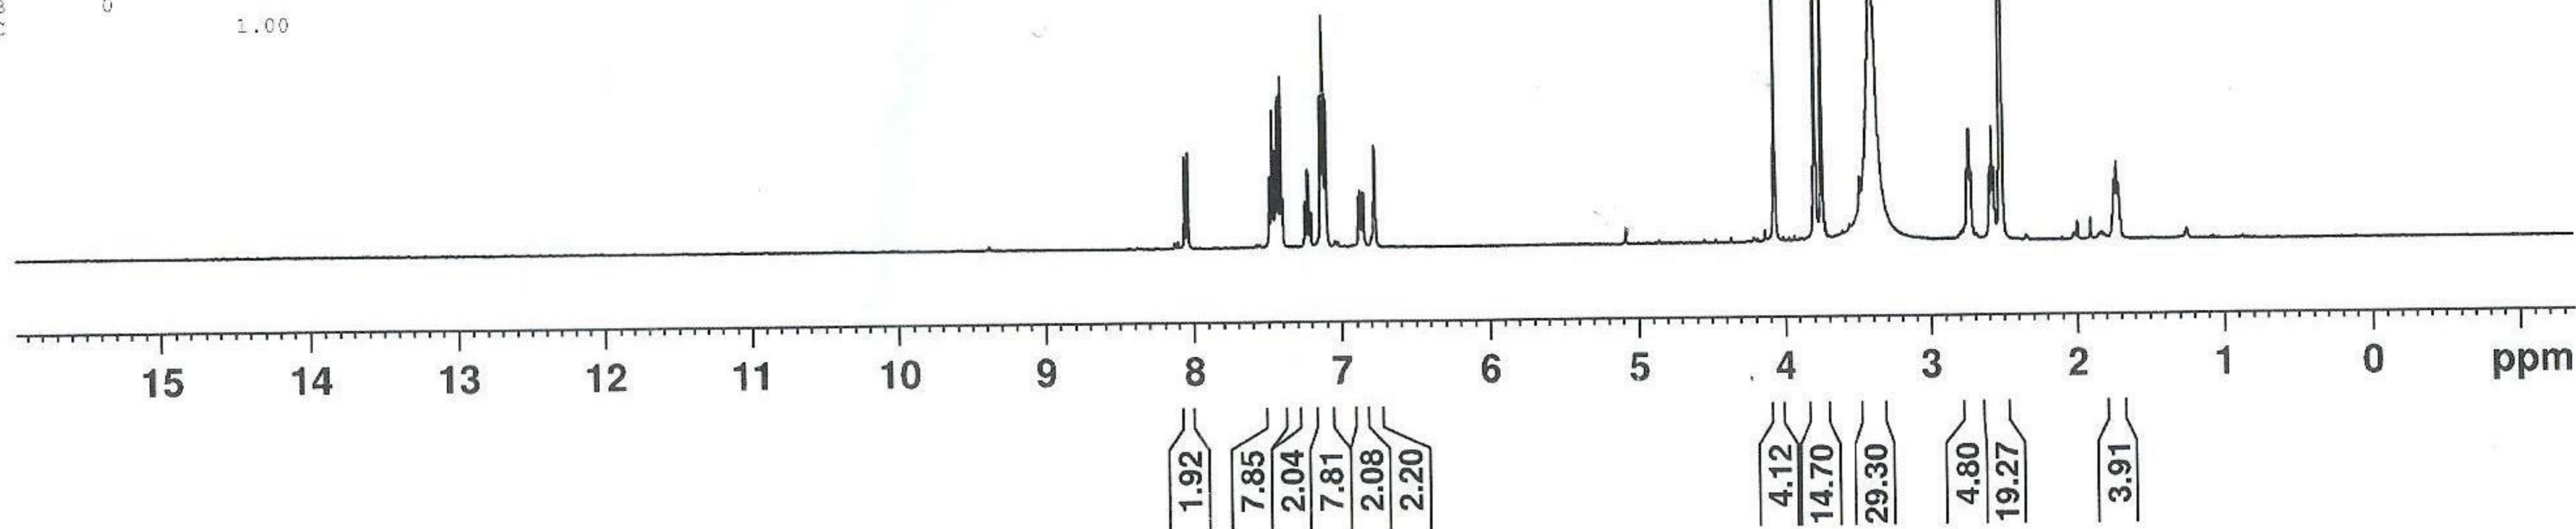

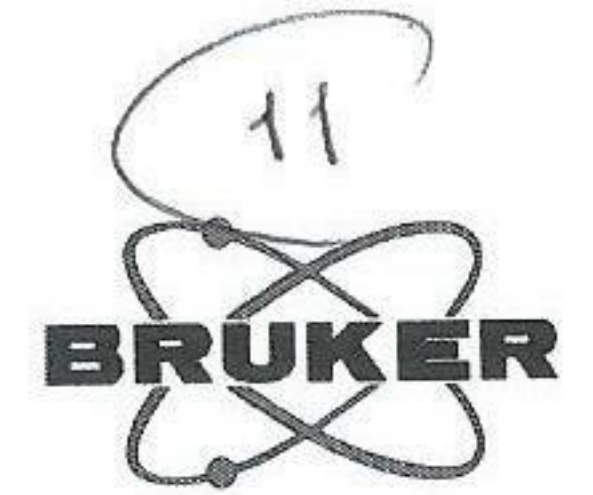

172.41 162.17 161.51 161.11 157.20 156.36  
 143.08 130.72 130.48 130.16 126.92 125.22 124.62 119.88 118.60 113.76 113.08  
 65.74 55.68 40.59 40.38 40.17 39.96 39.76 39.55 39.34 32.60 29.94 27.15 22.24

Current Data Parameters  
 NAME Nesreen Saeed\_C\_I  
 EXPNO 10  
 PROCNO 1

F2 - Acquisition Parameters  
 Date\_ 20191030  
 Time 2.43  
 INSTRUM spect  
 PROBHD 5 mm PABBO BB/  
 PULPROG zgpg30  
 TD 65536  
 SOLVENT DMSO  
 NS 1200  
 DS 4  
 SWH 24038.461 Hz  
 FIDRES 0.366798 Hz  
 AQ 1.3631488 sec  
 RG 202.37  
 DW 20.800 usec  
 DE 6.50 usec  
 TE 298.1 K  
 D1 2.00000000 sec  
 D11 0.03000000 sec  
 TD0 1

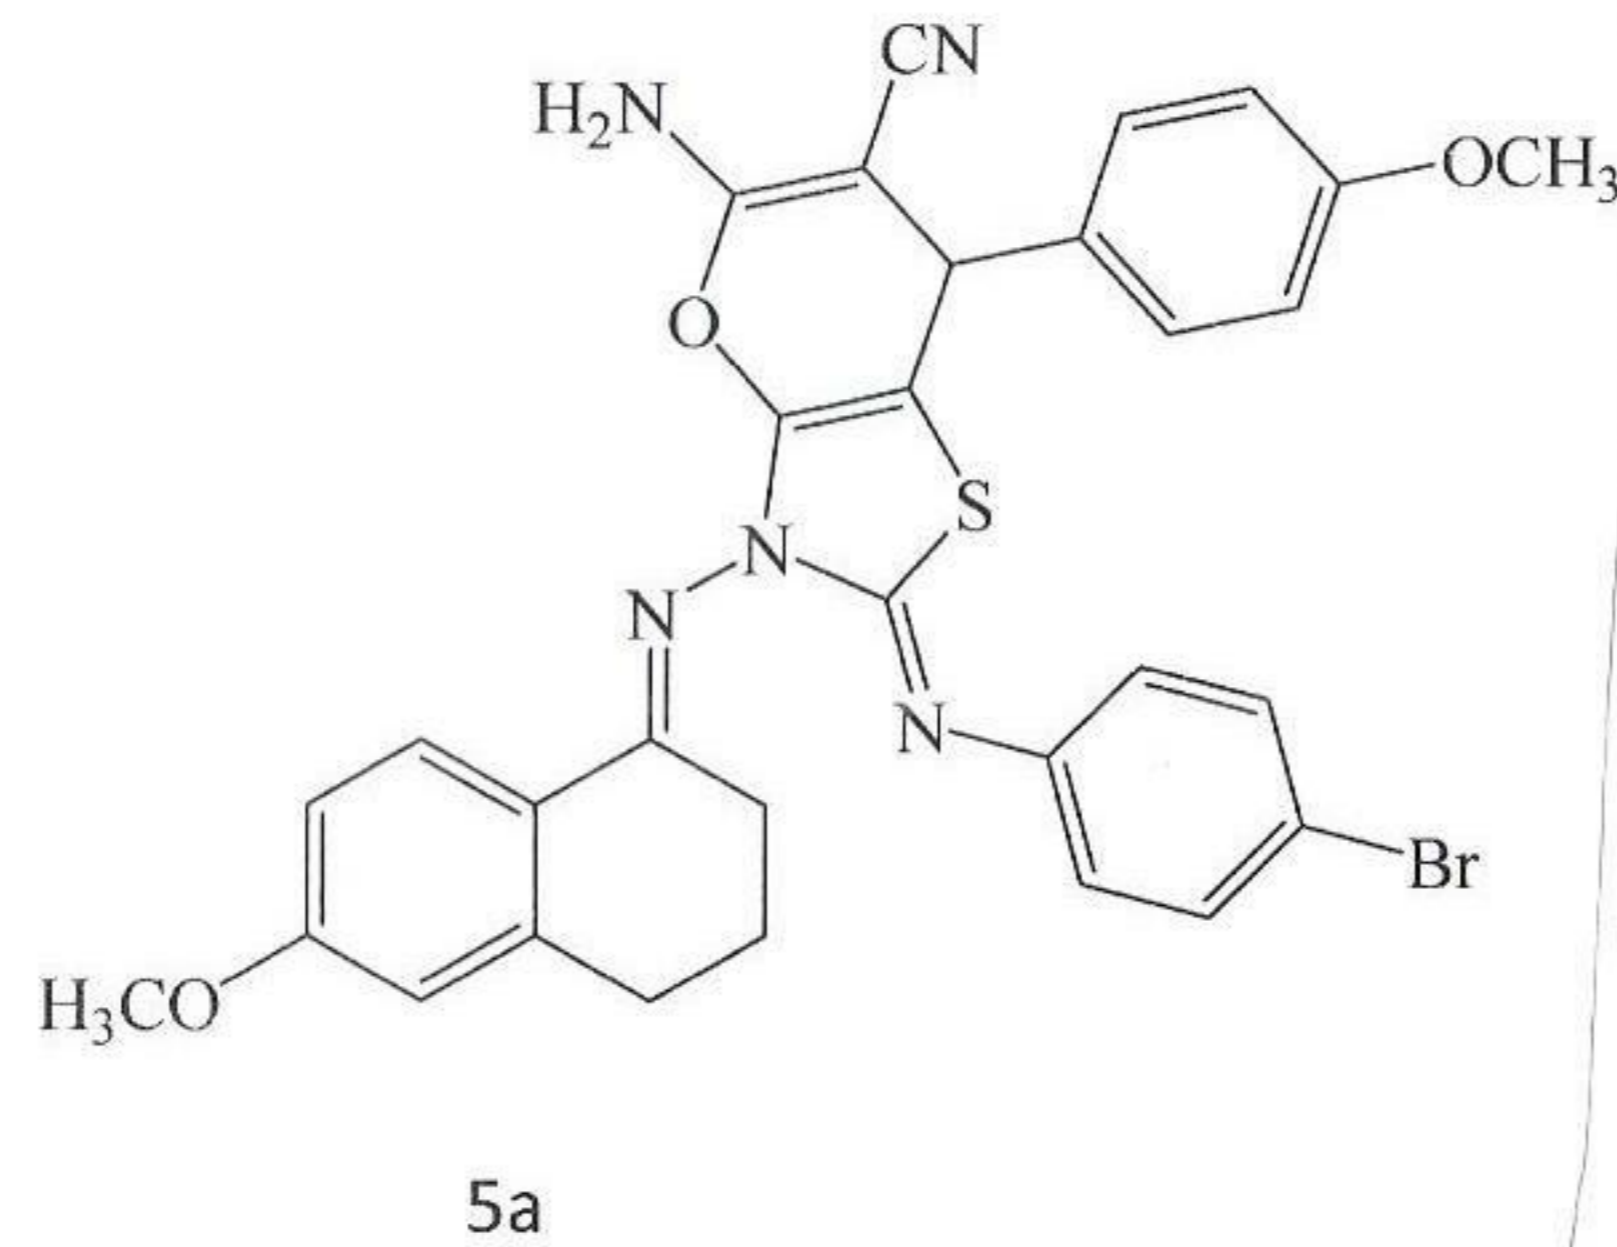

==== CHANNEL f1 =====  
 SFO1 100.6379178 MHz  
 NUC1 13C  
 P1 10.00 usec  
 PLW1 45.00000000 W

==== CHANNEL f2 =====  
 SFO2 400.1916008 MHz  
 NUC2 1H  
 CPDPRG[2] waltz16

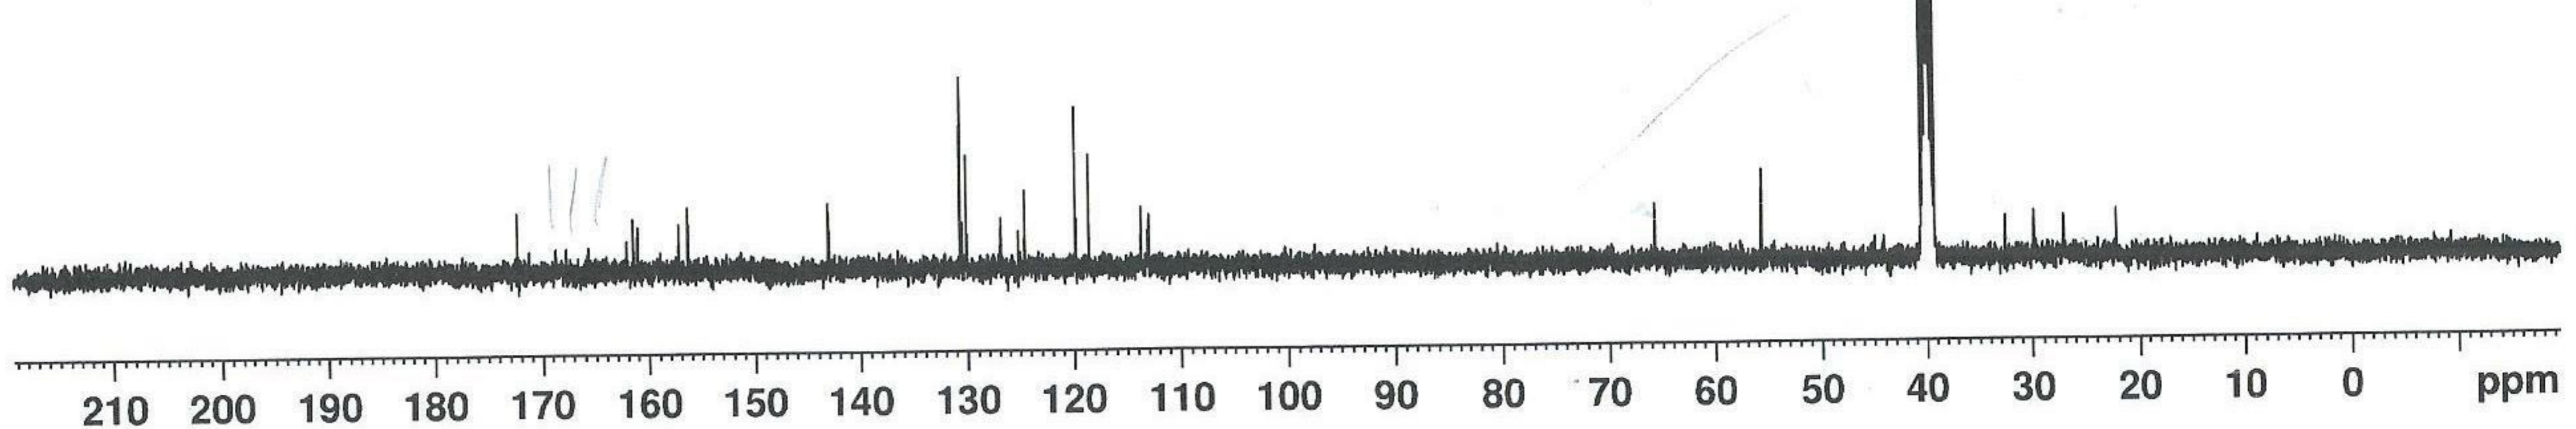

196.58

163.57  
162.50  
161.14  
156.48  
155.64  
147.68  
143.41  
134.95  
132.37  
132.15  
130.77  
130.71  
129.16  
126.93  
126.22  
124.94  
121.92  
113.75  
113.07  
103.14  
102.07

55.95  
55.70  
40.61  
40.40  
40.19  
39.98  
39.77  
39.57  
39.36  
38.85  
30.19  
29.94  
29.79  
27.37  
22.21  
18.29

Current Data Parameters  
NAME Nesreen Saeed\_C\_9  
EXPNO 10  
PROCNO 1

F2 - Acquisition Parameters  
Date\_ 20191030  
Time 1.32  
INSTRUM spect  
PROBHD 5 mm PABBO BB/  
PULPROG zgpg30  
TD 63536  
SOLVENT DMSO  
NS 1200  
DS 4  
SWH 24038.461 Hz  
FIDRES 0.366798 Hz  
AQ 1.3631488 sec  
RG 202.37  
DW 20.800 usec  
DE 6.50 usec  
TE 298.1 K  
D1 2.00000000 sec  
D11 0.03000000 sec  
TD0 1

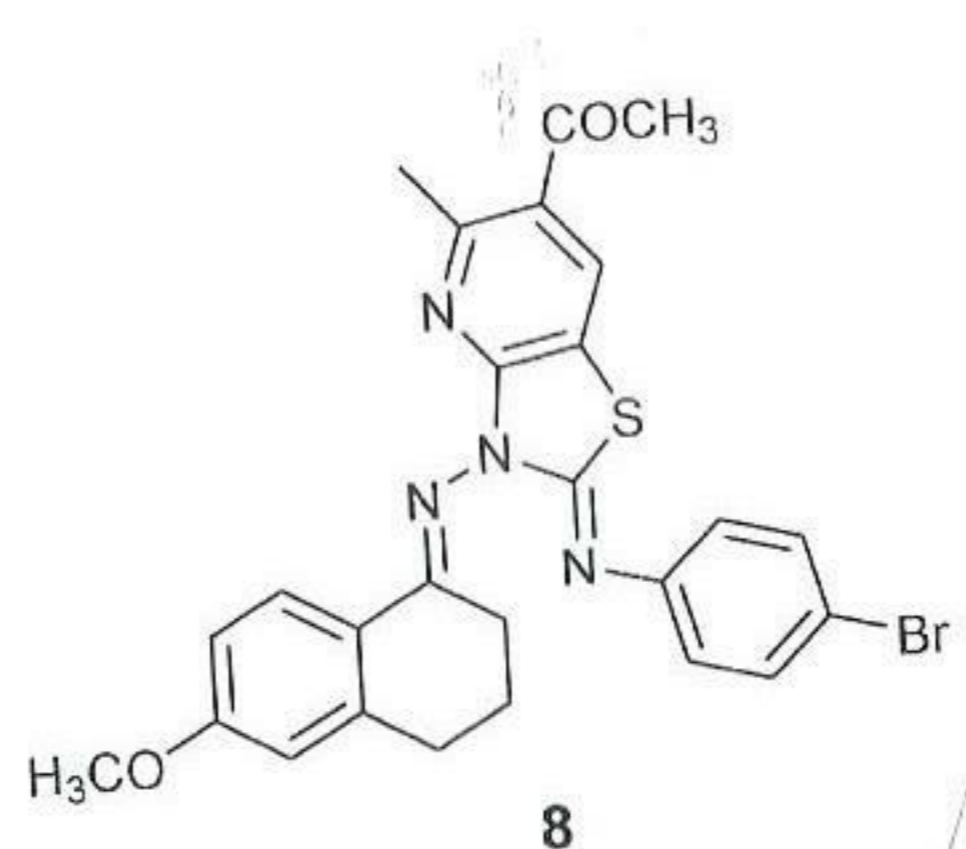

==== CHANNEL f1 =====  
SFO1 100.6379178 MHz  
NUC1 13C  
P1 10.00 usec  
PLW1 45.00000000 W  
  
==== CHANNEL f2 =====  
SFO2 400.1916008 MHz  
NUC2 1H  
CPDPRG[2] waltz16

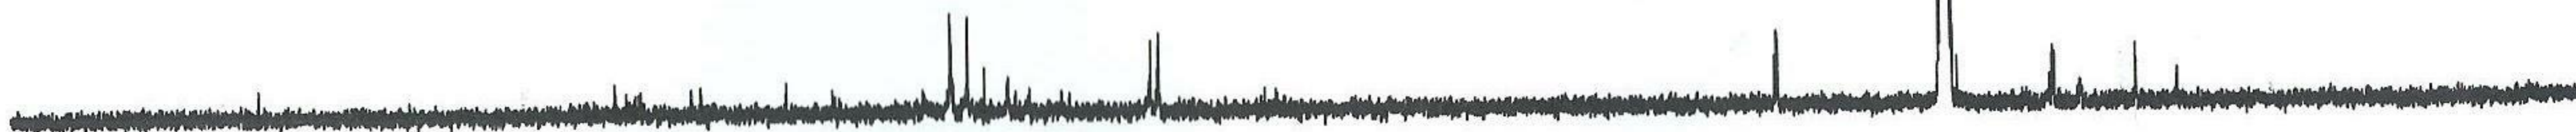

210 200 190 180 170 160 150 140 130 120 110 100 90 80 70 60 50 40 30 20 10 0 ppm

167.19  
166.87  
160.87  
159.93  
159.05  
144.87  
142.79  
135.48  
132.09  
131.76  
130.74  
126.83  
125.44  
121.18  
116.26  
113.72  
112.98  
85.30  
55.61  
42.45  
40.52  
40.31  
40.10  
39.89  
39.68  
39.47  
39.26  
29.99  
27.22  
22.24

Current Data Parameters  
NAME Nesreen Saeed\_C\_12  
EXPNO 10  
PROCNO 1

F2 - Acquisition Parameters  
Date\_ 20191030  
Time 10.52  
INSTRUM spect  
PROBHD 5 mm PABBO BB/  
PULPROG zgpg30  
TD 65536  
SOLVENT DMSO  
NS 200  
DS 4  
SWH 24038.461 Hz  
FIDRES 0.366798 Hz  
AQ 1.3631488 sec  
RG 202.37  
DW 20.800 usec  
DE 6.50 usec  
TE 298.0 K  
D1 2.00000000 sec  
D11 0.03000000 sec  
TD0 1

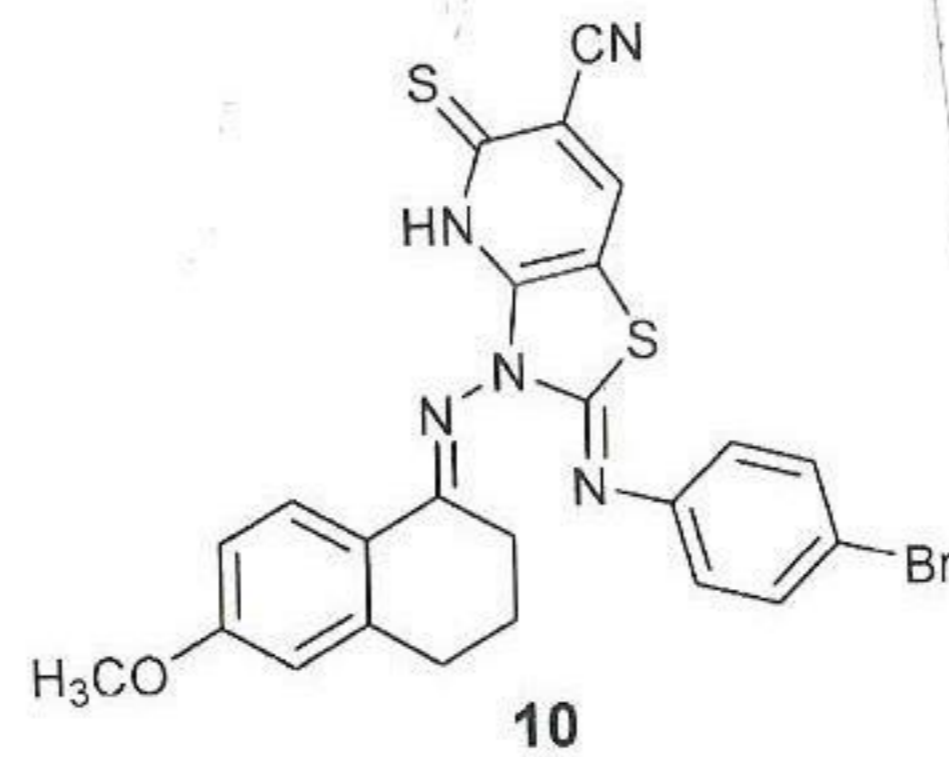

==== CHANNEL f1 =====  
SFO1 100.6379178 MHz  
NUC1 13C  
P1 10.00 usec  
PLW1 45.00000000 W  
  
==== CHANNEL f2 =====  
SFO2 400.1916008 MHz  
NUC2 1H  
CPDPRG[2] waltz16

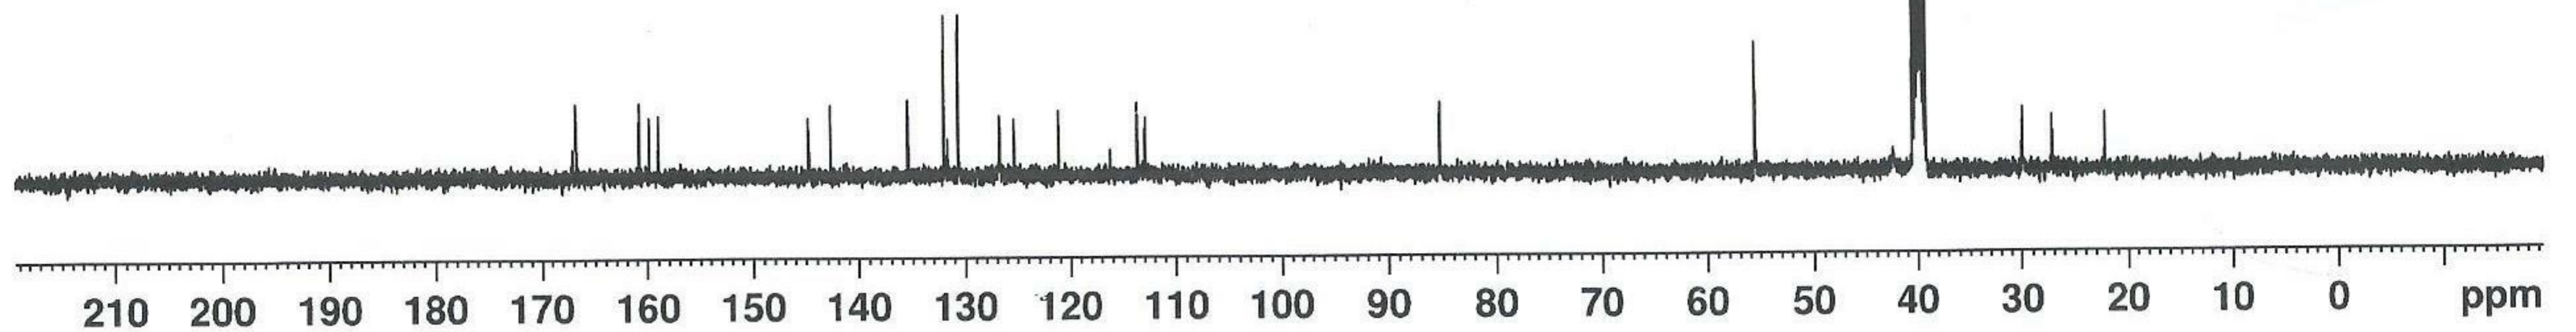

Supplement: f1 [file 8649745.f1.pdf]
